# Supplementary material
Source: PubMed Central journal article supplement (PMC9647558)
Supplement: PEDS_2021052368SupplementaryData.pdf [file PEDS_2021052368SupplementaryData.pdf]

## Supplemental Information

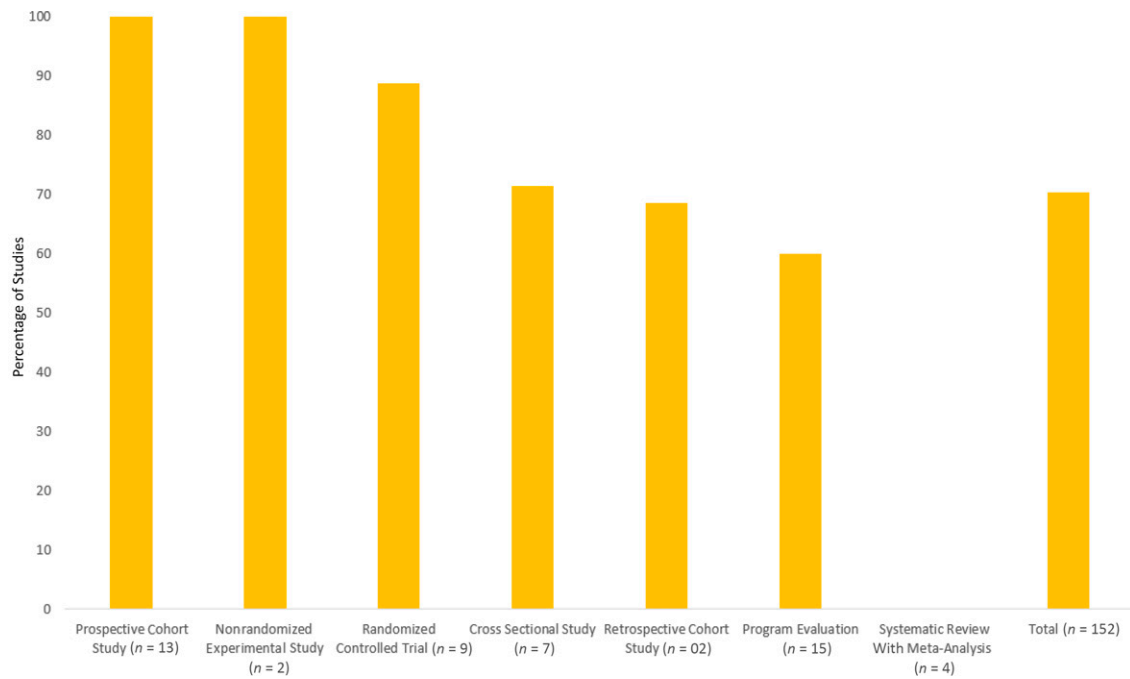

### SUPPLEMENTAL FIGURE 3

Reporting of race/ethnicity data by study type.

**SUPPLEMENTAL TABLE 4** Ovid MEDLINE Search Strategy

---

|    |                                                                                                                                                                                                                                                                                                                                                                                                                                                                                                                                                                                                                                                                                                                                                                                                                                                                                                                                                                                                                                                                                                                                                                                                                                                                                                             |
|----|-------------------------------------------------------------------------------------------------------------------------------------------------------------------------------------------------------------------------------------------------------------------------------------------------------------------------------------------------------------------------------------------------------------------------------------------------------------------------------------------------------------------------------------------------------------------------------------------------------------------------------------------------------------------------------------------------------------------------------------------------------------------------------------------------------------------------------------------------------------------------------------------------------------------------------------------------------------------------------------------------------------------------------------------------------------------------------------------------------------------------------------------------------------------------------------------------------------------------------------------------------------------------------------------------------------|
| 1  | exp "Opioid-Related Disorders"/ or opiate substitution treatment/                                                                                                                                                                                                                                                                                                                                                                                                                                                                                                                                                                                                                                                                                                                                                                                                                                                                                                                                                                                                                                                                                                                                                                                                                                           |
| 2  | ((opiod* or opiate* or heroin or fentanyl or oxycodone or oxycontin or hydrocodone or Vicodin or codeine or morphine or Percocet or oxymorphone or Opana or Kadian or Avinza or meperidine) and (abuse* or abusing or addict* or dependency or "use disorder" or "use disorders")).ti,ab.                                                                                                                                                                                                                                                                                                                                                                                                                                                                                                                                                                                                                                                                                                                                                                                                                                                                                                                                                                                                                   |
| 3  | ((opiod* or opiate* or heroin or fentanyl or oxycodone or oxycontin or hydrocodone or Vicodin or codeine or morphine or Percocet or oxymorphone or Opana or Kadian or Avinza or meperidine) adj2 ("use" or using or user or users or used or misuse)).ti,ab.                                                                                                                                                                                                                                                                                                                                                                                                                                                                                                                                                                                                                                                                                                                                                                                                                                                                                                                                                                                                                                                |
| 4  | 1 or 2 or 3                                                                                                                                                                                                                                                                                                                                                                                                                                                                                                                                                                                                                                                                                                                                                                                                                                                                                                                                                                                                                                                                                                                                                                                                                                                                                                 |
| 5  | (pregnan* or peripartum or "peri partum" or perinatal or "peri natal" or postpartum or "post partum" or antepartum or "ante partum" or prenatal or "pre natal" or antenatal or "ante natal" or puerperium).ti,ab.                                                                                                                                                                                                                                                                                                                                                                                                                                                                                                                                                                                                                                                                                                                                                                                                                                                                                                                                                                                                                                                                                           |
| 6  | Pregnant women/ or postpartum period/ or pregnancy/ or exp perinatal care/ or prenatal care/                                                                                                                                                                                                                                                                                                                                                                                                                                                                                                                                                                                                                                                                                                                                                                                                                                                                                                                                                                                                                                                                                                                                                                                                                |
| 7  | 5 or 6                                                                                                                                                                                                                                                                                                                                                                                                                                                                                                                                                                                                                                                                                                                                                                                                                                                                                                                                                                                                                                                                                                                                                                                                                                                                                                      |
| 8  | exp pregnancy outcome/ or exp "Patient Acceptance of Health Care"/ or exp pregnancy complications/ or exp "infant, low birth weight"/ or exp infant mortality/ or drug overdose/ or cesarean section/ or length of stay/ or exp infant death/                                                                                                                                                                                                                                                                                                                                                                                                                                                                                                                                                                                                                                                                                                                                                                                                                                                                                                                                                                                                                                                               |
| 9  | ("medications for opioid use disorder" or "medications for treatment of opioid use disorder" or overdose or "adequate care" or mortality or morbidity or "gestational diabetes" or "prenatal high blood sugar" or preeclampsia or "high blood pressure" or hypertension or eclampsia or "prenatal depression" or "antenatal depression" or "postpartum depression" or "pregnancy loss" or "fetal demise" or complications or "failure to progress" or "fetal distress" or "perinatal asphyxia" or "shoulder dystocia" or malposition or "cephalopelvic disproportion" or "uterine rupture" or "rapid labor" or "cesarean section" or "caesarean section" or forceps or "maternal death" or "placenta previa" or "abruptio placentae" or "placental abruption" or PROM or "preterm rupture of membranes" or stillbirth or stillborn or death or "birth outcome*" or "low birthweight" or preterm or prematur* or "small for gestational age" or NAS or "neonatal abstinence syndrome*" or "neonatal withdrawal syndrome" or NOWS or "length of stay" or custody or "fetal alcohol" or FASD or hemorrhage or SIDS or "health care utilization" or "healthcare utilization" or "health care utilisation" or "healthcare utilisation" or "health services utilization" or "health services utilisation").ti,ab. |
| 10 | 8 or 9                                                                                                                                                                                                                                                                                                                                                                                                                                                                                                                                                                                                                                                                                                                                                                                                                                                                                                                                                                                                                                                                                                                                                                                                                                                                                                      |
| 11 | 10 and 4 and 7                                                                                                                                                                                                                                                                                                                                                                                                                                                                                                                                                                                                                                                                                                                                                                                                                                                                                                                                                                                                                                                                                                                                                                                                                                                                                              |
| 12 | (case reports or comment or editorial or letter or "review").pt.                                                                                                                                                                                                                                                                                                                                                                                                                                                                                                                                                                                                                                                                                                                                                                                                                                                                                                                                                                                                                                                                                                                                                                                                                                            |
| 13 | exp Africa/ or exp Caribbean region/ or Central America/ or Latin America/ or exp Canada/ or Greenland/ or Mexico/ or exp South America/ or Antarctic regions/ or arctic regions/ or exp Asia/ or exp Europe/ or exp islands/ or exp Oceania/                                                                                                                                                                                                                                                                                                                                                                                                                                                                                                                                                                                                                                                                                                                                                                                                                                                                                                                                                                                                                                                               |
| 14 | animals/ not humans/                                                                                                                                                                                                                                                                                                                                                                                                                                                                                                                                                                                                                                                                                                                                                                                                                                                                                                                                                                                                                                                                                                                                                                                                                                                                                        |
| 15 | (mice or mouse or animal or animals or porcine or pig or swine or rat or rats or murine).ti.                                                                                                                                                                                                                                                                                                                                                                                                                                                                                                                                                                                                                                                                                                                                                                                                                                                                                                                                                                                                                                                                                                                                                                                                                |
| 16 | 11 NOT (12 or 13 or 14 or 15)                                                                                                                                                                                                                                                                                                                                                                                                                                                                                                                                                                                                                                                                                                                                                                                                                                                                                                                                                                                                                                                                                                                                                                                                                                                                               |

---

**SUPPLEMENTAL TABLE 5 All Quantitative Study Data (n = 152)**

| Study Details                |                               |                                              | Outcome                                                                        |                                                                                                                                 | R/E Reporting      |                    |                         | Bivariate Analyses by R/E     |                      |                        | Multivariable Modeling |                       |                   |                    |
|------------------------------|-------------------------------|----------------------------------------------|--------------------------------------------------------------------------------|---------------------------------------------------------------------------------------------------------------------------------|--------------------|--------------------|-------------------------|-------------------------------|----------------------|------------------------|------------------------|-----------------------|-------------------|--------------------|
| Author, Publication Year     | Study Dates, Location         | Type of Study, (N)                           | Primary Exposure                                                               | Primary Outcome                                                                                                                 | Category           | Mentioned in Study | Discussed in Discussion | Hispanic and/or Non-White (%) | Analysis of Exposure | Difference in Exposure | Analysis of Outcome    | Difference in Outcome | Adjusted for R/E? | Stratified by R/E? |
| Agthe et al (81), 2009       | 2002–2005<br>Baltimore, MD    | Randomized controlled trial (80)             | Clonidine treatment of NAS                                                     | Duration of opioid pharmacologic treatment of NAS                                                                               | Infant             | Yes                | No                      | 40                            | Yes                  | No                     | No                     | N/A                   | N/A               | N/A                |
| Almano et al (27), 2009      | 2000–2006<br>Philadelphia, PA | Retrospective cohort study (258)             | In utero methadone exposure                                                    | GA                                                                                                                              | Infant             | Yes                | Yes                     | 27.5                          | Yes                  | No                     | No                     | N/A                   | Yes               | N/A                |
| Angiolita et al (82), 2016   | 2012<br>National              | Cross-sectional study (8292)                 | States that permit child abuse charges for nonprescribed drug use in pregnancy | MOUD use in pregnancy                                                                                                           | Prenatal/obstetric | Yes                | No                      | 15                            | Yes                  | No                     | Yes                    | No                    | N/A               | N/A                |
| Bachhuber et al (83), 2017   | 2013–2014<br>National         | Cross-sectional study (3354)                 | Medicaid coverage of methadone maintenance                                     | Use of MOUD among pregnant women                                                                                                | Prenatal/obstetric | Yes                | No                      | 15.1                          | Yes                  | Yes                    | No                     | N/A                   | Yes               | No                 |
| Backes et al (84), 2012      | 2007–2009<br>Columbus, OH     | Retrospective cohort study (121)             | NAS treatment inpatient or outpatient combined                                 | LOS                                                                                                                             | Infant             | Yes                | No                      | 2                             | No                   | N/A                    | No                     | N/A                   | N/A               | N/A                |
| Bell et al (22), 2016        | 2010–2015<br>Knoxville, TN    | Retrospective cohort study (301)             | Opioid detoxification                                                          | PTB/intrauterine fetal demise                                                                                                   | Infant             | Yes                | No                      | 12                            | Yes                  | Yes                    | No                     | N/A                   | No                | No                 |
| Benningfield (28), 2012      | 2005–2008<br>International    | Retrospective Cohort Study 175               | Anxiety and depression symptoms                                                | Treatment discontinuation, ongoing use, PTB                                                                                     | Prenatal/obstetric | Yes                | No                      | 16.6                          | Yes                  | No                     | No                     | N/A                   | Yes               | N/A                |
| Borghella (85), 2003         | 1996–1999<br>Philadelphia, PA | Retrospective cohort study (100)             | Maternal methadone dose                                                        | NAS                                                                                                                             | Infant             | No                 | No                      | Not given                     | No                   | N/A                    | N/A                    | N/A                   | N/A               | N/A                |
| Bhatt-Mehta et al (86), 2019 | 2009–2017<br>Ann Arbor, MI    | Retrospective cohort study (136)             | In utero exposure to opioids and SSRIs vs opioids alone                        | LOT                                                                                                                             | Infant             | No                 | No                      | Not given                     | No                   | N/A                    | N/A                    | N/A                   | N/A               | N/A                |
| Binin et al (87), 2019       | 2019<br>Portland, OR          | Systematic review with meta-analysis unknown | Buprenorphine vs methadone                                                     | NAS                                                                                                                             | Infant             | No                 | No                      | Not given                     | No                   | N/A                    | N/A                    | N/A                   | N/A               | N/A                |
| Bogen et al (88), 2018       | 2010–2012<br>Pittsburgh, PA   | Randomized controlled trial (49)             | Study formula Enfamil 20 or 24 calories/ounce                                  | Days to weight nadir, maximum percent weight loss, days to return to BW, and percentage weight change per day from days 4 to 21 | Infant             | Yes                | No                      | 6.1                           | Yes                  | N/A                    | N/A                    | N/A                   | N/A               | N/A                |

## SUPPLEMENTAL TABLE 5 Continued

| Study Details            |                                    | Outcome                                     |                                             |                                                                   | R/E Reporting      |                    |                         | Bivariate Analyses by R/E     |                      |                        | Multivariable Modeling |                       |                   |                    |
|--------------------------|------------------------------------|---------------------------------------------|---------------------------------------------|-------------------------------------------------------------------|--------------------|--------------------|-------------------------|-------------------------------|----------------------|------------------------|------------------------|-----------------------|-------------------|--------------------|
| Author, Publication Year | Study Dates, Location              | Type of Study, (N)                          | Primary Exposure                            | Primary Outcome and Severity                                      | Category           | Mentioned in Study | Discussed in Discussion | Hispanic and/or Non-White (%) | Analysis of Exposure | Difference in Exposure | Analysis of Outcome    | Difference in Outcome | Adjusted for R/E? | Stratified by R/E? |
| Bracero et al (89), 2016 | 2003–2009 Morgantown, WV           | Retrospective cohort study (91)             | SSRI use concomitant with methadone         | NAS incidence and severity                                        | Infant             | Yes                | No                      | 1.1                           | Yes                  | No                     | No                     | N/A                   | N/A               | N/A                |
| Brogly et al (90), 2018  | 2015–2016 Massachusetts            | Prospective cohort study (113)              | Methadone vs buprenorphine                  | Adherence to clinical care, urine screen results, MOUD cessation  | Prenatal/obstetric | Yes                | No                      | 19.5                          | No                   | N/A                    | No                     | N/A                   | N/A               | N/A                |
| Brogly et al (29), 2018  | 2006–2011, 2015–2016 Massachusetts | Retrospective cohort study (1020)           | Methadone or buprenorphine during pregnancy | GA, LBW, LOS                                                      | Infant             | Yes                | Yes                     | 23.2                          | Yes                  | No                     | No                     | N/A                   | Yes               | No                 |
| Brogly et al (91), 2014  | 2000–2013 Multiple sites           | Systematic review with meta-analysis (1370) | Buprenorphine vs methadone                  | NAS severity                                                      | Infant             | No                 | Yes                     | Not given                     | No                   | N/A                    | No                     | N/A                   | N/A               | N/A                |
| Chavan et al (92), 2017  | 2015–2017 Lexington, KY            | Prospective cohort study (118)              | Antepartum buprenorphine dose               | NAS incidence                                                     | Infant             | Yes                | No                      | 7.8                           | No                   | N/A                    | Yes                    | No                    | N/A               | N/A                |
| Chisolm et al (83), 2011 | 2005–2008 International            | Retrospective cohort study (119)            | Cigarette smoking, depression               | NAS severity                                                      | Infant             | Yes                | No                      | 11                            | No                   | N/A                    | No                     | N/A                   | N/A               | N/A                |
| Choo et al (94), 2004    | 2000–2001 Baltimore, MD            | Prospective cohort study (29)               | Prenatal tobacco exposure                   | NAS severity                                                      | Infant             | Yes                | No                      | 88                            | Yes                  | No                     | No                     | N/A                   | N/A               | N/A                |
| Chung et al (85), 2020   | 2013–2016 Philadelphia, PA         | Retrospective cohort study (138)            | Prenatal care                               | Well-child care                                                   | Infant             | Yes                | No                      | 30                            | Yes                  | Yes                    | Yes                    | No                    | Yes               | Yes                |
| Cochran et al (86), 2018 | 2015–2016 Pittsburgh, PA           | Nonrandomized experimental study (21)       | Patient navigation intervention             | Ongoing use, prenatal care, discharge status                      | Prenatal/obstetric | Yes                | No                      | 5                             | No                   | N/A                    | No                     | N/A                   | N/A               | N/A                |
| Coker et al (97), 2018   | 2014–2016 Little Rock, AR          | Retrospective cohort study (64)             | Exploratory                                 | Buprenorphine adherence                                           | Prenatal/obstetric | Yes                | No                      | 20                            | Yes                  | No                     | No                     | N/A                   | N/A               | N/A                |
| Collier et al (88), 2019 | 2009–2015 Burlington, VT           | Retrospective cohort study (98)             | Colocation of MOUD and prenatal care        | Pregnancy interval, pregnancy intention, postpartum contraception | Postpartum         | Yes                | No                      | 0                             | N/A                  | N/A                    | N/A                    | N/A                   | N/A               | N/A                |

**SUPPLEMENTAL TABLE 5 Continued**

| Study Details               |                           | Outcome                           |                                                |                                                                   | R/E Reporting      |                    |                         | Bivariate Analyses by R/E     |                      |                        | Multivariable Modeling |                       |                   |                    |
|-----------------------------|---------------------------|-----------------------------------|------------------------------------------------|-------------------------------------------------------------------|--------------------|--------------------|-------------------------|-------------------------------|----------------------|------------------------|------------------------|-----------------------|-------------------|--------------------|
| Author, Publication Year    | Study Dates, Location     | Type of Study, (N)                | Primary Exposure                               | Primary                                                           | Category           | Mentioned in Study | Discussed in Discussion | Hispanic and/or Non-White (%) | Analysis of Exposure | Difference in Exposure | Analysis of Outcome    | Difference in Outcome | Adjusted for R/E? | Stratified by R/E? |
| Coulson et al (99), 2019    | 2014–2017 Asheville, NC   | Retrospective cohort study (221)  | Maternal methadone or buprenorphine dose       | NAS, fetal growth (HC and BL)                                     | Infant             | Yes                | No                      | 95.5                          | Yes                  | No                     | No                     | N/A                   | N/A               | N/A                |
| Coyle et al (100), 2012     | 2005–2008 International   | Retrospective cohort study (39)   | Buprenorphine vs methadone                     | Neurobehavior                                                     | Infant             | Yes                | No                      | 12.9                          | Yes                  | No                     | No                     | N/A                   | N/A               | N/A                |
| Crane et al (101), 2019     | 2019 Ohio                 | Program evaluation (1098)         | MOUD through maternal medical home model       | Patient engagement, retention in prenatal care, access to housing | Prenatal/obstetric | Yes                | No                      | 9                             | Yes                  | No                     | No                     | N/A                   | N/A               | N/A                |
| Davis et al (102), 2018     | 2014–2017 National        | Randomized controlled trial (116) | Methadone or morphine to treat NAS             | LOS                                                               | Infant             | Yes                | No                      | 24.1                          | Yes                  | No                     | No                     | N/A                   | N/A               | N/A                |
| DeAtley et al (103), 2017   | 2014–2015 Kentucky        | Program evaluation (59)           | Morphine dose based on NAS management protocol | LOS, LOT                                                          | Infant             | No                 | No                      | Not given                     | No                   | N/A                    | N/A                    | N/A                   | N/A               | N/A                |
| Ellis et al (104), 2019     | 2010–2017 Detroit, MI     | Retrospective cohort study (81)   | Exploratory                                    | Treatment retention, opioid misuse                                | Postpartum         | Yes                | No                      | 29.1                          | N/A                  | N/A                    | Yes                    | No                    | N/A               | Yes                |
| Gaalema et al (105), 2013   | 2009–2012 Burlington, VT  | Retrospective cohort study (75)   | Methadone or buprenorphine exposure in utero   | Time to NAS treatment                                             | Infant             | No                 | No                      | Not given                     | No                   | N/A                    | N/A                    | N/A                   | N/A               | N/A                |
| Gaalema et al (106), 2012   | 2012 International        | Retrospective cohort study (129)  | Methadone or buprenorphine exposure in utero   | NAS severity and incidence, time to treatment                     | Infant             | No                 | No                      | Not given                     | No                   | N/A                    | N/A                    | N/A                   | N/A               | N/A                |
| Garrison et al (23), 2016   | 2011–2013 Albuquerque, NM | Prospective cohort study (359)    | Opioid only or polydrug use during pregnancy   | Fetal growth (BW, BL, SGA)                                        | Infant             | Yes                | Yes                     | 78.8                          | Yes                  | Yes                    | No                     | N/A                   | No                | N/A                |
| Gawronski et al (107), 2014 | 2010–2011 Columbus, OH    | Retrospective cohort study (150)  | Methadone or buprenorphine exposure in utero   | GA, BW, NICU admission, LOS, LOT, NAS incidence                   | Infant             | Yes                | No                      | 3.3                           | Yes                  | No                     | No                     | N/A                   | N/A               | N/A                |
| Gibson et al (108), 2017    | 2000–2014 Cleveland, OH   | Retrospective cohort study (403)  | Gestational age                                | NAS (need for pharmacologic treatment, LOS, LOT)                  | Infant             | Yes                | No                      | 18.9                          | Yes                  | No                     | No                     | N/A                   | N/A               | N/A                |

## SUPPLEMENTAL TABLE 5 Continued

| Study Dates, Location      |                                | Type of Study, (N)                    |                                                                                                                                            | Primary Exposure                                                                                                                                           |                    | Primary Outcome    |                         | Category                      |                      | Mentioned in Study     |                     | R/E Reporting         |                   | Outcome            |  | Bivariate Analyses by R/E |  | Multivariable Modeling |  |
|----------------------------|--------------------------------|---------------------------------------|--------------------------------------------------------------------------------------------------------------------------------------------|------------------------------------------------------------------------------------------------------------------------------------------------------------|--------------------|--------------------|-------------------------|-------------------------------|----------------------|------------------------|---------------------|-----------------------|-------------------|--------------------|--|---------------------------|--|------------------------|--|
| Author, Publication Year   | Study Dates, Location          | Type of Study, (N)                    | Primary Exposure                                                                                                                           | Primary Outcome                                                                                                                                            | Category           | Mentioned in Study | Discussed in Discussion | Hispanic and/or Non-White (%) | Analysis of Exposure | Difference in Exposure | Analysis of Outcome | Difference in Outcome | Adjusted for R/E? | Stratified by R/E? |  |                           |  |                        |  |
| Goodman et al (24), 2019   | 2017–2018 Northern New England | Program evaluation (223)              | Implementation of best practice checklist                                                                                                  | GA, LBW, breastfeeding at discharge, access to naloxone, nicotine replacement therapy, breastfeeding counseling                                            | Multiple           | Yes                | No                      | 2.2                           | Yes                  | Yes                    | No                  | N/A                   | N/A               | N/A                |  |                           |  |                        |  |
| Gopalan et al (35), 2019   | 2012–2015 Pittsburgh, PA       | Retrospective cohort study (118)      | Fixed-dose vs symptom-triggered benzodiazepine dosing                                                                                      | Benzodiazepine used during detoxification, methadone conversion vs stable methadone dose, neonatal Apgar scores, NICU admission, obstetrical complications | Multiple           | Yes                | Yes                     | 4.3                           | No                   | N/A                    | No                  | N/A                   | N/A               | N/A                |  |                           |  |                        |  |
| Gressler et al (109), 2019 | 2007–2015 National             | Retrospective cohort study (110 285)  | Regional and state legislation on OUD during pregnancy                                                                                     | OUD diagnosis during pregnancy and MOUD receipt                                                                                                            | Prenatal/obstetric | No                 | No                      | Not given                     | No                   | N/A                    | N/A                 | N/A                   | N/A               | N/A                |  |                           |  |                        |  |
| Grossman et al (110), 2017 | 2008–2016 New Haven, CT        | Program evaluation (287)              | Implementation of plan-do-study-act cycles (nonpharmacologic treatment, PRN morphine, new assessment, inpatient admission instead of NICU) | LOS, morphine use, hospital costs                                                                                                                          | Infant             | Yes                | No                      | 12.1                          | Yes                  | No                     | No                  | N/A                   | N/A               | N/A                |  |                           |  |                        |  |
| Guille et al (30), 2020    | 2017–2018 Charleston, SC       | Nonrandomized experimental study (98) | In person v telemedicine treatment                                                                                                         | Treatment retention, UDS results, MAS diagnosis                                                                                                            | Multiple           | Yes                | No                      | 13.3                          | Yes                  | No                     | No                  | N/A                   | Yes               | N/A                |  |                           |  |                        |  |
| Heller et al (111), 2017   | 2017 Bangor, ME                | Prospective cohort study (60)         | NAS requiring pharmacologic treatment                                                                                                      | Neurologic outcomes                                                                                                                                        | Infant             | Yes                | Yes                     | 0                             | N/A                  | N/A                    | N/A                 | N/A                   | N/A               | N/A                |  |                           |  |                        |  |
| Hensley et al (112), 2018  | 2009–2015 Illinois             | Retrospective cohort study (74)       | Concurrent depression diagnosis                                                                                                            | Prenatal care adherence                                                                                                                                    | Prenatal/obstetric | Yes                | No                      | Not given                     | No                   | N/A                    | No                  | N/A                   | N/A               | N/A                |  |                           |  |                        |  |

**SUPPLEMENTAL TABLE 5 Continued**

| Study Details                       |                            |                                      | Outcome                                                      |                                                                   | R/E Reporting      |                    |                         | Bivariate Analyses by R/E     |                      |                        | Multivariable Modeling |                       |                   |                    |
|-------------------------------------|----------------------------|--------------------------------------|--------------------------------------------------------------|-------------------------------------------------------------------|--------------------|--------------------|-------------------------|-------------------------------|----------------------|------------------------|------------------------|-----------------------|-------------------|--------------------|
| Author, Publication Year            | Study Dates, Location      | Type of Study, (N)                   | Primary Exposure                                             | Primary                                                           | Category           | Mentioned in Study | Discussed in Discussion | Hispanic and/or Non-White (%) | Analysis of Exposure | Difference in Exposure | Analysis of Outcome    | Difference in Outcome | Adjusted for R/E? | Stratified by R/E? |
| Holbrook et al (31), 2013           | 2005-2008 International    | Retrospective cohort study (175)     | Methadone vs buprenorphine treatment of OUD during pregnancy | Withdrawal symptoms during induction to MOUD, treatment retention | Prenatal/obstetric | Yes                | No                      | 16.6                          | No                   | N/A                    | Yes                    | No                    | Yes               | No                 |
| Holbrook and Kaltenbach (113), 2010 | 2005-2009 Philadelphia, PA | Retrospective cohort study (308)     | Biological sex                                               | Need for NAS treatment, LOT, peak dose of medication              | Infant             | Yes                | No                      | 16.56                         | no                   | N/A                    | No                     | N/A                   | N/A               | N/A                |
| Holbrook and Kaltenbach (114), 2012 | 2008-2011 Philadelphia, PA | Retrospective cohort study (125)     | Exploratory                                                  | Postpartum depression                                             | Postpartum         | Yes                | No                      | 15.2                          | No                   | N/A                    | No                     | N/A                   | N/A               | N/A                |
| Holbrook et al (115), 2012          | 2005-2008 International    | Retrospective cohort study (131)     | Methadone or buprenorphine                                   | Maternal infection incidence, obstetrical outcomes                | Prenatal/obstetric | No                 | No                      | Not given                     | No                   | N/A                    | N/A                    | N/A                   | N/A               | N/A                |
| Holmes et al (116), 2016            | 2012-2015 Lebanon, NH      | Program evaluation (207)             | Implementation of plan-do-study-act cycles                   | Pharmacologic treatment of NAS, LOS, hospital costs               | Infant             | No                 | No                      | Not given                     | No                   | N/A                    | N/A                    | N/A                   | N/A               | N/A                |
| Howard et al (117), 2017            | 2015-2016 Boston, MA       | Retrospective cohort study (88)      | Parental presence at bedside                                 | LOS, LOT, NAS severity                                            | Infant             | No                 | No                      | Not given                     | No                   | N/A                    | N/A                    | N/A                   | N/A               | N/A                |
| Huybrechts et al (32), 2017         | 2000-2010 National         | Retrospective cohort study (201 275) | Coexposure to opioids and psychotropic medications           | NAS severity                                                      | Infant             | Yes                | No                      | 34                            | Yes                  | No                     | No                     | N/A                   | Yes               | No                 |
| Isemann et al (118), 2011           | 2002-2007 Cincinnati, OH   | Retrospective cohort study (128)     | Exploratory                                                  | Response to methadone therapy for NAS                             | Infant             | No                 | No                      | Not given                     | No                   | N/A                    | N/A                    | N/A                   | N/A               | N/A                |
| Isemann et al (119), 2017           | 2013-2016 Cincinnati, OH   | Retrospective cohort study (264)     | Exploratory                                                  | NAS severity and incidence                                        | Infant             | No                 | No                      | Not given                     | No                   | N/A                    | N/A                    | N/A                   | N/A               | N/A                |
| Jancaitis et al (25), 2020          | 1998-1998 Baltimore, MD    | Prospective cohort study (210)       | Methadone vs nonpharmacologic treatment                      | Dropout of residential care against medical advice                | Prenatal/obstetric | Yes                | No                      | 81.4                          | Yes                  | Yes                    | Yes                    | No                    | N/A               | No                 |
| Jansson et al (120), 2017           | 2012-2016 Baltimore, MD    | Prospective cohort study (41)        | Intrauterine exposure to buprenorphine                       | NAS severity                                                      | Infant             | Yes                | No                      | 7.3                           | No                   | N/A                    | No                     | N/A                   | N/A               | N/A                |
| Jansson et al (26), 2012            | 2006-2009 Baltimore, MD    | Prospective cohort study (49)        | Methadone or polydrug exposure                               | Fetal neurodevelopment, infant development                        | Infant             | Yes                | No                      | 38.8                          | Yes                  | Yes                    | No                     | N/A                   | No                | N/A                |

SUPPLEMENTAL TABLE 5 Continued

| Study Details                    |                            | Outcome                           |                                                              | R/E Reporting                                                                                         |          |                    | Bivariate Analyses by R/E |                               |                      | Multivariable Modeling |                     |                       |                   |                    |
|----------------------------------|----------------------------|-----------------------------------|--------------------------------------------------------------|-------------------------------------------------------------------------------------------------------|----------|--------------------|---------------------------|-------------------------------|----------------------|------------------------|---------------------|-----------------------|-------------------|--------------------|
| Author, Publication Year         | Study Dates, Location      | Type of Study, (N)                | Primary Exposure                                             | Primary Outcome                                                                                       | Category | Mentioned in Study | Discussed in Discussion   | Hispanic and/or Non-White (%) | Analysis of Exposure | Difference in Exposure | Analysis of Outcome | Difference in Outcome | Adjusted for R/E? | Stratified by R/E? |
| Jansson et al (121), 2007        | 2002–2004<br>Baltimore, MD | Prospective cohort study (50)     | Methadone and vaginal tone                                   | NAS symptoms and pharmacologic treatment                                                              | Infant   | Yes                | No                        | 42                            | Yes                  | No                     | No                  | N/A                   | N/A               | N/A                |
| Jansson et al (122), 2010        | 2006–2008<br>Baltimore, MD | Prospective cohort study (64)     | Methadone                                                    | NAS severity                                                                                          | Infant   | Yes                | No                        | 27.7                          | No                   | N/A                    | No                  | N/A                   | N/A               | N/A                |
| John McConnell et al (123), 2020 | 2012–2017<br>Portland, OR  | Program evaluation (1531)         | Implementation of Project Nurture                            | CPS involvement, prenatal care, GA, LBW                                                               | Multiple | Yes                | No                        | 92.9                          | Yes                  | Yes                    | No                  | N/A                   | Yes               | No                 |
| Jones et al (124), 2005          | 2000–2003<br>Baltimore, MD | Randomized controlled trial (20)  | Methadone vs buprenorphine treatment of OUD during pregnancy | Incidence of NAS, amount of opioid pharmacologic treatment of NAS, LOS, peak NAS score                | Infant   | Yes                | No                        | 80                            | Yes                  | No                     | No                  | N/A                   | N/A               | N/A                |
| Jones et al (125), 2014          | 2005–2008<br>International | Retrospective cohort study (58)   | Maternal buprenorphine dose                                  | Peak NAS score, GA, Apgar scores, HC, birth length and weight, amount morphine to treat NAS, LOS, LOT | Infant   | No                 | No                        | Not given                     | No                   | N/A                    | N/A                 | N/A                   | N/A               | N/A                |
| Jones et al (126), 2013          | 2005–2008<br>International | Retrospective cohort study (73)   | Maternal methadone dose at delivery                          | NAS incidence and severity, pharmacologic treatment of NAS, LOS                                       | Infant   | No                 | No                        | Not given                     | No                   | N/A                    | N/A                 | N/A                   | N/A               | N/A                |
| Jones et al (127), 2013          | 2005–2008<br>International | Retrospective cohort study (131)  | Tobacco use at study entry                                   | NAS incidence and severity, pharm treatment of NAS, LOS                                               | Infant   | Yes                | No                        | Not given                     | No                   | N/A                    | No                  | N/A                   | N/A               | N/A                |
| Jones et al (128), 2010          | 2005–2008<br>International | Randomized controlled trial (175) | Methadone vs buprenorphine treatment of OUD during pregnancy | NAS incidence, score, LOS, pharmacologic treatment of NAS, HC                                         | Infant   | Yes                | No                        | 16.6                          | Yes                  | No                     | No                  | N/A                   | N/A               | N/A                |



**SUPPLEMENTAL TABLE 5 Continued**

| Author, Publication Year     | Study Dates, Location |                             | Type of Study, (N)               | Primary Exposure                                                                      |                                                                                                                                                  | Primary Outcome    | Category | R/E Reporting      |                         | Bivariate Analyses by R/E     |                      |                        | Multivariable Modeling |                     |                       |
|------------------------------|-----------------------|-----------------------------|----------------------------------|---------------------------------------------------------------------------------------|--------------------------------------------------------------------------------------------------------------------------------------------------|--------------------|----------|--------------------|-------------------------|-------------------------------|----------------------|------------------------|------------------------|---------------------|-----------------------|
|                              | Year                  | Location                    |                                  | Exposure                                                                              | Outcome                                                                                                                                          |                    |          | Mentioned in Study | Discussed in Discussion | Hispanic and/or Non-White (%) | Analysis of Exposure | Difference in Exposure |                        | Analysis of Outcome | Difference in Outcome |
| Kaltenbach et al (129), 2018 | 2005–2008             | International               | Retrospective cohort study (98)  | Prenatal exposure to methadone or buprenorphine                                       | Child growth, cognition, language, sensory processing, and temperament, maternal perceptions of stress, home environment, and addiction severity | Infant             | Yes      | No                 | 6                       | No                            | N/A                  | No                     | N/A                    | N/A                 | N/A                   |
| Kaltenbach et al (130), 2012 | 2005–2008             | International               | Retrospective cohort study (129) | Exploratory                                                                           | NAS expression                                                                                                                                   | Infant             | No       | No                 | Not given               | No                            | N/A                  | N/A                    | N/A                    | N/A                 | N/A                   |
| Knittel et al (131), 2020    | 2016–2018             | North Carolina state prison | Retrospective cohort study (179) | Exploratory, incarceration in a North Carolina state prison during pregnancy with OUD | Receipt of MOUD during pregnancy, referral to MOUD after incarceration                                                                           | Prenatal/obstetric | Yes      | No                 | 62.4                    | N/A                           | N/A                  | Yes                    | No                     | No                  | N/A                   |
| Kohta et al (132), 2019      | 2009–2012             | Pittsburgh, PA              | Retrospective cohort study (791) | Prenatal LARC intent                                                                  | Postpartum LARC receipt                                                                                                                          | Postpartum         | Yes      | No                 | 3.9                     | Yes                           | No                   | Yes                    | No                     | N/A                 | N/A                   |
| Kraft (133), 2011            | 2008–2010             | Philadelphia, PA            | Randomized controlled trial (24) | Sublingual buprenorphine vs oral morphine to treat NAS                                | Neonatal safety, LOS, LOT                                                                                                                        | Infant             | Yes      | No                 | 4.2                     | No                            | N/A                  | No                     | N/A                    | N/A                 | N/A                   |
| Kraft et al (134), 2017      | 2011–2016             | Philadelphia, PA            | Randomized controlled trial (63) | Buprenorphine vs morphine for NAS treatment                                           | LOT for NAS                                                                                                                                      | Infant             | Yes      | No                 | 17.5                    | Yes                           | No                   | No                     | N/A                    | N/A                 | N/A                   |
| Krans et al (46), 2018       | 2014–2016             | Pittsburgh, PA              | Program evaluation (248)         | Woman-centered OUD treatment services through Pregnancy Resource Center               | Pregnancy-specific buprenorphine doses, prenatal and postpartum care, breastfeeding, contraception receipt                                       | Multiple           | Yes      | Yes                | 6                       | Yes                           | No                   | No                     | N/A                    | N/A                 | N/A                   |
| Krans et al (135), 2016      | 2009–2012             | Pittsburgh, PA              | Retrospective cohort study (791) | Exploratory                                                                           | Methadone vs buprenorphine during pregnancy                                                                                                      | Prenatal/obstetric | Yes      | No                 | 3.1                     | N/A                           | N/A                  | Yes                    | No                     | N/A                 | N/A                   |

**SUPPLEMENTAL TABLE 5 Continued**

| Study Details                |                          | Outcome                           |                                              |                                                                                                 | R/E Reporting      |                    |                         | Bivariate Analyses by R/E     |                      |                        | Multivariable Modeling |                       |                   |                    |
|------------------------------|--------------------------|-----------------------------------|----------------------------------------------|-------------------------------------------------------------------------------------------------|--------------------|--------------------|-------------------------|-------------------------------|----------------------|------------------------|------------------------|-----------------------|-------------------|--------------------|
| Author: Publication Year     | Study Dates, Location    | Type of Study, (N)                | Primary Exposure                             | Primary Outcome                                                                                 | Category           | Mentioned in Study | Discussed in Discussion | Hispanic and/or Non-White (%) | Analysis of Exposure | Difference in Exposure | Analysis of Outcome    | Difference in Outcome | Adjusted for R/E? | Stratified by R/E? |
| Krans et al (136), 2016      | 2009–2012 Pittsburgh, PA | Retrospective cohort study (791)  | Exploratory                                  | Screening for HCV, prenatal care for women with HCV infection, rate of HCV treatment enrollment | Prenatal/obstetric | Yes                | No                      | 3.1                           | N/A                  | N/A                    | Yes                    | No                    | N/A               | N/A                |
| Krans et al (39), 2018       | 2008–2013 Pennsylvania   | Retrospective cohort study (7805) | Exploratory                                  | Postpartum contraception receipt                                                                | Postpartum         | Yes                | No                      | 12.2                          | N/A                  | N/A                    | Yes                    | Yes                   | Yes               | Yes                |
| Kreitinger et al (137), 2016 | 2016 Albuquerque, NM     | Retrospective cohort study (70)   | Prenatal alcohol exposure                    | NAS incidence and severity                                                                      | Infant             | Yes                | Yes                     | 81.4                          | Yes                  | No                     | No                     | N/A                   | N/A               | N/A                |
| Lander et al (138), 2015     | 2015 Morgantown, WV      | Randomized controlled trial (45)  | Mixed-gender or pregnancy-only group therapy | Treatment retention, relapse, NAS incidence, patient satisfaction with group therapy            | Multiple           | No                 | No                      | Not given                     | No                   | N/A                    | N/A                    | N/A                   | N/A               | N/A                |
| Lawlor et al (45), 2020      | 2014–2016 Lexington, KY  | Program evaluation (64)           | Care-by-Parent Program participation         | Rate of treatment-requiring NAS                                                                 | Infant             | Yes                | Yes                     | Not given                     | No                   | N/A                    | No                     | N/A                   | No                | N/A                |
| Lee et al (139), 2015        | 2007–2013 Pennsylvania   | Retrospective cohort study (139)  | Exploratory                                  | LUS in NICU                                                                                     | Infant             | No                 | No                      | Not given                     | No                   | N/A                    | N/A                    | N/A                   | N/A               | N/A                |
| Lemon et al (33), 2018       | 2013–2015 Pittsburgh, PA | Retrospective cohort study (716)  | Methadone vs buprenorphine                   | NAS incidence                                                                                   | Infant             | Yes                | No                      | 5.7                           | Yes                  | No                     | No                     | N/A                   | Yes               | N/A                |
| Lemon et al (34), 2018       | 2013–2015 Pittsburgh, PA | Retrospective cohort study (716)  | Methadone vs buprenorphine                   | Relationship between PTB and NAS incidence                                                      | Infant             | Yes                | No                      | 5.7                           | Yes                  | No                     | No                     | N/A                   | Yes               | N/A                |
| Lim et al (140), 2009        | 2002–2007 Columbus, OH   | Retrospective cohort study (68)   | High-dose methadone during pregnancy         | Duration of NAS                                                                                 | Infant             | Yes                | No                      | 3                             | Yes                  | No                     | No                     | N/A                   | N/A               | N/A                |
| Liu et al (141), 2015        | 2003–2010 Florida        | Retrospective cohort study (117)  | Exploratory                                  | Rate of NAS                                                                                     | Infant             | Yes                | Yes                     | 8                             | N/A                  | N/A                    | No                     | N/A                   | No                | No                 |
| Lo-Gigamic et al (40), 2019  | 2008–2015 Pennsylvania   | Retrospective cohort study (2361) | Trajectory groups                            | Buprenorphine treatment adherence                                                               | Multiple           | Yes                | Yes                     | 5.5                           | Yes                  | Yes                    | Yes                    | Yes                   | Yes               | Yes                |

**SUPPLEMENTAL TABLE 5 Continued**

| Study Details              |                         | Outcome                          |                                                                        |                                                                                                                                                                                                                                                                                                                           | R/E Reporting |                    |                         | Bivariate Analyses by R/E     |                      |                        | Multivariable Modeling |                       |                   |                    |
|----------------------------|-------------------------|----------------------------------|------------------------------------------------------------------------|---------------------------------------------------------------------------------------------------------------------------------------------------------------------------------------------------------------------------------------------------------------------------------------------------------------------------|---------------|--------------------|-------------------------|-------------------------------|----------------------|------------------------|------------------------|-----------------------|-------------------|--------------------|
| Author, Publication Year   | Study Dates, Location   | Type of Study, (N)               | Primary Exposure                                                       | Primary                                                                                                                                                                                                                                                                                                                   | Category      | Mentioned in Study | Discussed in Discussion | Hispanic and/or Non-White (%) | Analysis of Exposure | Difference in Exposure | Analysis of Outcome    | Difference in Outcome | Adjusted for R/E? | Stratified by R/E? |
| Lopian et al (44), 2019    | 2012–2017 Buffalo, NY   | Retrospective cohort study (108) | Exploratory                                                            | Treatment retention, ongoing use                                                                                                                                                                                                                                                                                          | Postpartum    | Yes                | Yes                     | 17.6                          | N/A                  | N/A                    | Yes                    | No                    | N/A               | N/A                |
| Lund et al (142), 2012     | 2005–2008 Baltimore, MD | Retrospective cohort study (25)  | Methadone or buprenorphine vs methadone-assisted withdrawal            | Need for pharmacologic treatment of NAS, peak NAS score, neonatal, HC, LOS, LOT, BW, BL, GA, and Apgar score, cesarean delivery, maternal weight gain in pregnancy, fetal presentation at delivery, anesthesia during delivery, UDS at delivery, delivery complications, number of prenatal visits, study discontinuation | Multiple      | Yes                | No                      | 52                            | Yes                  | No                     | No                     | N/A                   | N/A               | N/A                |
| McCarthy et al (143), 2008 | 1999–2003 Davis, CA     | Retrospective cohort study (57)  | Methadone throughout pregnancy vs methadone induction during pregnancy | NAS treatment, LOS, BW, GA, illicit use at delivery                                                                                                                                                                                                                                                                       | Infant        | Yes                | No                      | 37                            | Yes                  | No                     | No                     | N/A                   | N/A               | N/A                |
| McCarthy et al (144), 2015 | 2008–2013 Davis, CA     | Retrospective cohort study (62)  | Methadone split dosing and increase dose for withdrawal symptoms       | NAS incidence                                                                                                                                                                                                                                                                                                             | Infant        | Yes                | No                      | 17                            | No                   | N/A                    | No                     | No                    | N/A               | N/A                |
| McCarthy et al (145), 2005 | 1999–2003 Davis, CA     | Retrospective cohort study (81)  | Methadone dose                                                         | NAS incidence and pharmacologic treatment, LOS, ongoing use                                                                                                                                                                                                                                                               | Multiple      | Yes                | No                      | 37                            | Yes                  | No                     | No                     | N/A                   | N/A               | N/A                |

**SUPPLEMENTAL TABLE 5 Continued**

| Study Details                |                          |                                  | Outcome                                                          |                                                                                                           |          | R/E Reporting      |                         |                               | Bivariate Analyses by R/E |                        |                     | Multivariable Modeling |                   |                    |
|------------------------------|--------------------------|----------------------------------|------------------------------------------------------------------|-----------------------------------------------------------------------------------------------------------|----------|--------------------|-------------------------|-------------------------------|---------------------------|------------------------|---------------------|------------------------|-------------------|--------------------|
| Author, Publication Year     | Study Dates, Location    | Type of Study, (N)               | Primary Exposure                                                 | Primary                                                                                                   | Category | Mentioned in Study | Discussed in Discussion | Hispanic and/or Non-White (%) | Analysis of Exposure      | Difference in Exposure | Analysis of Outcome | Difference in Outcome  | Adjusted for R/E? | Stratified by R/E? |
| McDaniel et al (146), 2020   | 2012-2018 Washington     | Retrospective cohort study (323) | Intrauterine methadone only vs methadone/polydrug exposures      | NAS (Time to maximum Finnegan scores, proportion requiring scheduled morphine, LOS)                       | Infant   | Yes                | No                      | 35.6                          | Yes                       | No                     | No                  | N/A                    | N/A               | N/A                |
| McNicholas et al (147), 2012 | 2005-2008 International  | Retrospective cohort study (175) | HCV infection                                                    | Hepatic enzyme levels                                                                                     | Multiple | No                 | No                      | Not given                     | No                        | N/A                    | N/A                 | N/A                    | N/A               | N/A                |
| Meyer (148), 2012            | 2000-2006 Burlington, VT | Retrospective cohort study (149) | Access to opioid agonist therapy                                 | Prenatal care, BW                                                                                         | Multiple | No                 | No                      | Not given                     | No                        | N/A                    | N/A                 | N/A                    | N/A               | N/A                |
| Meyer et al (149), 2015      | 2000-2012 Burlington, VT | Retrospective cohort study (609) | Methadone vs buprenorphine                                       | GA, BW, LOS, LOT, breastfeeding, discharge to parental custody, NAS treatment                             | Infant   | No                 | No                      | Not given                     | No                        | N/A                    | N/A                 | N/A                    | N/A               | N/A                |
| Mitchell et al (150), 2017   | 2013-2015 Indiana        | Retrospective cohort study (54)  | Care in NICU vs special care nursery                             | Time from birth to first dose or oral morphine                                                            | Infant   | No                 | No                      | Not given                     | No                        | N/A                    | N/A                 | N/A                    | N/A               | N/A                |
| Mullins et al (151), 2020    | 2014-2018 North Carolina | Retrospective cohort study (193) | Buprenorphine vs naloxone                                        | NAS requiring treatment, maternal outcomes                                                                | Multiple | Yes                | No                      | 14.5                          | Yes                       | No                     | No                  | N/A                    | N/A               | N/A                |
| Napolitano et al (152), 2013 | 2010-2012 Florida        | Retrospective cohort study (112) | Combined methadone program vs inpatient morphine program         | LOS                                                                                                       | Infant   | No                 | No                      | Not given                     | No                        | N/A                    | N/A                 | N/A                    | N/A               | N/A                |
| Nguyen et al (43), 2018      | 2016-2017 Morgantown, WV | Retrospective cohort study (26)  | Buprenorphine + naloxone exposure during pregnancy               | GA, Apgar scores, BW, BL, and HC, NAS treatment, LOS                                                      | Infant   | Yes                | Yes                     | 0                             | N/A                       | N/A                    | N/A                 | N/A                    | N/A               | N/A                |
| O'Connor et al (153), 2013   | 2007-2012 Augusta, ME    | Retrospective cohort study (65)  | Buprenorphine                                                    | Breastfeeding, NAS                                                                                        | Infant   | Yes                | No                      | <5                            | No                        | N/A                    | No                  | N/A                    | N/A               | N/A                |
| O'Connor et al (154), 2016   | 2007-2013 Maine          | Retrospective cohort study (148) | Concurrent use of buprenorphine and antidepressants in pregnancy | Severity and duration of NAS                                                                              | Infant   | No                 | No                      | Not given                     | No                        | N/A                    | N/A                 | N/A                    | N/A               | N/A                |
| O'Connor et al (155), 2016   | 2007-2014 Maine          | Retrospective cohort study (155) | Maternal buprenorphine dose at delivery                          | GA, BW, method of delivery, Apgar scores, peak NAS score, duration of NAS, pharmacologic treatment of NAS | Infant   | No                 | No                      | Not given                     | No                        | N/A                    | N/A                 | N/A                    | N/A               | N/A                |

**SUPPLEMENTAL TABLE 5 Continued**

| Study Details                      |                              |                                   | Outcome                                      |                                                                                                                                |            | R/E Reporting      |                         |                               | Bivariate Analyses by R/E |                        |                     | Multivariable Modeling |                   |                    |
|------------------------------------|------------------------------|-----------------------------------|----------------------------------------------|--------------------------------------------------------------------------------------------------------------------------------|------------|--------------------|-------------------------|-------------------------------|---------------------------|------------------------|---------------------|------------------------|-------------------|--------------------|
| Author, Publication Year           | Study Dates, Location        | Type of Study, (N)                | Primary Exposure                             | Primary                                                                                                                        | Category   | Mentioned in Study | Discussed in Discussion | Hispanic and/or Non-White (%) | Analysis of Exposure      | Difference in Exposure | Analysis of Outcome | Difference in Outcome  | Adjusted for R/E? | Stratified by R/E? |
| O'Connor et al (42), 2018          | 2007–2015<br>Maine           | Retrospective cohort study (190)  | Exploratory                                  | Treatment retention                                                                                                            | Postpartum | Yes                | Yes                     | <5                            | No                        | N/A                    | No                  | N/A                    | N/A               | N/A                |
| O'Connor et al (156), 2017         | 2007–2015<br>Maine           | Retrospective cohort study (191)  | Third trimester marijuana use                | GA, BW, Apgar scores, NAS severity                                                                                             | Infant     | Yes                | No                      | <5                            | Yes                       | No                     | No                  | N/A                    | N/A               | N/A                |
| O'Connor et al (157), 2013         | 2007–2012<br>Maine           | Retrospective cohort study (90)   | Gender                                       | NAS score and pharm treatment                                                                                                  | Infant     | No                 | No                      | Not given                     | No                        | N/A                    | N/A                 | N/A                    | N/A               | N/A                |
| Parikh et al (21), 2019            | 2008–2017<br>Baltimore, MD   | Retrospective cohort study (345)  | Race                                         | Need for pharmacologic treatment of NAS                                                                                        | Infant     | Yes                | Yes                     | 35                            | N/A                       | N/A                    | Yes                 | Yes                    | Yes               | Yes                |
| Parlaman et al (158), 2019         | 2017–2018<br>Washington      | Program evaluation (304)          | Implementation of Eat-Sleep-Console protocol | LUS, medication dose for NAS treatment                                                                                         | Infant     | Yes                | No                      | 37                            | Yes                       | No                     | No                  | N/A                    | N/A               | N/A                |
| Parlett et al (159), 2019          | 2006–2017<br>National        | Retrospective cohort study (1807) | Exploratory                                  | NAS diagnosis                                                                                                                  | Infant     | Yes                | No                      | Not given                     | No                        | N/A                    | No                  | N/A                    | N/A               | N/A                |
| Parlier et al (160), 2014          | 2010–2012<br>North Carolina  | Retrospective cohort study (94)   | Exploratory                                  | Prenatal care utilization, postpartum contraception, GA, NAS diagnosis                                                         | Multiple   | Yes                | No                      | 6.4                           | N/A                       | N/A                    | No                  | N/A                    | N/A               | N/A                |
| Paterno et al (161), 2019          | 2015–2016<br>Greenfield, MA  | Program evaluation (38)           | EMPOWER program involvement                  | Breastfeeding initiation and at discharge, contraception, depression symptoms, neonatal outcomes, prenatal community referrals | Multiple   | Yes                | No                      | 5.3                           | Yes                       | No                     | No                  | N/A                    | N/A               | N/A                |
| Patton et al (35), 2019            | 2013–2015<br>Pennsylvania    | Retrospective cohort study (1562) | Pre- or post-Medicaid expansion              | Postpartum health care utilization and contraception initiation                                                                | Postpartum | Yes                | No                      | 13                            | Yes                       | No                     | Yes                 | Yes                    | Yes               | Yes                |
| Peacock-Chambers et al (162), 2019 | 2006–2013<br>Springfield, MA | Retrospective cohort study (256)  | Exploratory                                  | EI referral and enrollment                                                                                                     | Infant     | Yes                | Yes                     | 27.7                          | N/A                       | N/A                    | Yes                 | No                     | Yes               | N/A                |

**SUPPLEMENTAL TABLE 5 Continued**

| Study Details                 |                          | Outcome                           |                                                                                                     |                                                                                                   | R/E Reporting |                    |                         | Bivariate Analyses by R/E     |                      |                        | Multivariable Modeling |                       |                   |                    |
|-------------------------------|--------------------------|-----------------------------------|-----------------------------------------------------------------------------------------------------|---------------------------------------------------------------------------------------------------|---------------|--------------------|-------------------------|-------------------------------|----------------------|------------------------|------------------------|-----------------------|-------------------|--------------------|
| Author, Publication Year      | Study Dates, Location    | Type of Study, (N)                | Primary Exposure                                                                                    | Primary                                                                                           | Category      | Mentioned in Study | Discussed in Discussion | Hispanic and/or Non-White (%) | Analysis of Exposure | Difference in Exposure | Analysis of Outcome    | Difference in Outcome | Adjusted for R/E? | Stratified by R/E? |
| Peeler et al (20), 2020       | 2017–2019 Massachusetts  | Retrospective cohort study (1710) | Maternal R/E                                                                                        | Prenatal receipt of MOUD, NAS severity, EI referral, and biological parental custody at discharge | Multiple      | Yes                | Yes                     | 10.7                          | N/A                  | N/A                    | Yes                    | Yes                   | N/A               | Yes                |
| Pizano et al (163), 2011      | 2002–2006 Cincinnati, OH | Retrospective cohort study (174)  | Methadone dose                                                                                      | NAS incidence and severity, BW, GA, neonatal mortalities and morbidities                          | Infant        | Yes                | No                      | 1.7                           | Yes                  | No                     | No                     | N/A                   | N/A               | N/A                |
| Pritham et al (164), 2012     | 2005–2006 Bangor, ME     | Retrospective cohort study (152)  | Methadone vs buprenorphine                                                                          | LOS for NAS                                                                                       | Infant        | No                 | No                      | Not given                     | No                   | N/A                    | N/A                    | N/A                   | N/A               | N/A                |
| Rose-Jacobs et al (165), 2019 | 2013–2015 Boston, MA     | Prospective cohort study (75)     | Prenatal food insecurity                                                                            | NAS pharmacologic treatment, LOS for NAS                                                          | Infant        | Yes                | No                      | 17.1                          | No                   | N/A                    | No                     | N/A                   | N/A               | N/A                |
| Roth et al (166), 2020        | 2017 Huntington, WV      | Retrospective cohort study (176)  | Polysubstance exposure, toxicology vs toxicology and self-report to identify polysubstance exposure | NAS LOT and LOS                                                                                   | Infant        | Yes                | No                      | 8.5                           | No                   | N/A                    | No                     | N/A                   | N/A               | N/A                |
| Sanlorenzo et al (167), 2019  | 2009–2011 Tennessee      | Retrospective cohort study (822)  | Exploratory, prenatal benzodiazepine exposure                                                       | Pharmacologic treatment of NAS                                                                    | Infant        | Yes                | No                      | 2.3                           | N/A                  | N/A                    | Yes                    | No                    | N/A               | N/A                |
| Saunders et al (168), 2014    | 2010–2012 Knoxville, TN  | Program evaluation (386)          | NAS protocol implementation                                                                         | LOS, weaning time from opioids, adjunct medication use                                            | Infant        | No                 | No                      | Not given                     | No                   | N/A                    | N/A                    | N/A                   | N/A               | N/A                |
| Schauburger et al (169), 2020 | 2011–2018 La Crosse, WI  | Retrospective cohort study (94)   | Exploratory                                                                                         | Treatment retention, maintenance of custody                                                       | Postpartum    | Yes                | No                      | 3                             | N/A                  | N/A                    | No                     | N/A                   | N/A               | N/A                |
| Schiff et al (138), 2018      | 2006–2016 Boston, MA     | Retrospective cohort study (564)  | Exploratory                                                                                         | Breastfeeding initiation, continuation, and exclusivity                                           | Infant        | Yes                | Yes                     | 12                            | N/A                  | N/A                    | Yes                    | Yes                   | No                | Yes                |
| Schiff (170), 2018            | 2011–2015 Massachusetts  | Retrospective cohort study (4154) | OUD during pregnancy, exploratory                                                                   | Fatal or nonfatal opioid-related overdose events                                                  | Multiple      | Yes                | No                      | 37                            | N/A                  | N/A                    | Yes                    | Yes                   | N/A               | No                 |

**SUPPLEMENTAL TABLE 5 Continued**

| Study Details                |                            | Outcome                           |                                                       | R/E Reporting                                                                                |                    |                    | Bivariate Analyses by R/E |                               |                      | Multivariable Modeling |                     |                       |                   |                    |
|------------------------------|----------------------------|-----------------------------------|-------------------------------------------------------|----------------------------------------------------------------------------------------------|--------------------|--------------------|---------------------------|-------------------------------|----------------------|------------------------|---------------------|-----------------------|-------------------|--------------------|
| Author: Publication Year     | Study Dates, Location      | Type of Study, (N)                | Primary Exposure                                      | Primary                                                                                      | Category           | Mentioned in Study | Discussed in Discussion   | Hispanic and/or Non-White (%) | Analysis of Exposure | Difference in Exposure | Analysis of Outcome | Difference in Outcome | Adjusted for R/E? | Stratified by R/E? |
| Schiff et al (9), 2020       | 2011–2015 Massachusetts    | Retrospective cohort study (5247) | Maternal R/E                                          | Use of MOUD in year before delivery                                                          | Prenatal/obstetric | Yes                | Yes                       | 13.3                          | N/A                  | N/A                    | Yes                 | Yes                   | N/A               | Yes                |
| Scott et al (37), 2020       | 2011–2017 Indianapolis, IN | Retrospective cohort study (204)  | Exploratory                                           | Need for pharmacologic treatment of NAS                                                      | Infant             | Yes                | Yes                       | 10                            | N/A                  | N/A                    | Yes                 | Yes                   | Yes               | Yes                |
| Seligman et al (171), 2008   | 2000–2006 Philadelphia, PA | Retrospective cohort study (204)  | Exploratory                                           | NAS treatment                                                                                | Infant             | Yes                | Yes                       | 25                            | N/A                  | N/A                    | Yes                 | No                    | N/A               | N/A                |
| Seligman et al (172), 2010   | 1996–2006 Philadelphia, PA | Retrospective cohort study (388)  | Maternal methadone dose at delivery                   | NAS treatment                                                                                | Infant             | Yes                | No                        | 32                            | Yes                  | Yes                    | No                  | N/A                   | Yes               | No                 |
| Short et al (36), 2016       | 2012–2014 Pennsylvania     | Retrospective cohort study (3725) | Breastfeeding status                                  | Infant LOS                                                                                   | Infant             | Yes                | Yes                       | 10                            | Yes                  | No                     | No                  | N/A                   | Yes               | No                 |
| Short et al (173), 2018      | 1996–2014 National         | Cross sectional Study (88 241)    | Exploratory                                           | MOUD receipt                                                                                 | Prenatal/obstetric | Yes                | No                        | Not given                     | N/A                  | N/A                    | Yes                 | Yes                   | No                | Yes                |
| Singh et al (174), 2020      | 2015–2018 Springfield, MA  | Program evaluation (264)          | EMPOWER and rooming-in program participation          | Infant LOS, NICU LOS and admission, NAS pharmacologic treatment                              | Infant             | No                 | No                        | Not given                     | No                   | N/A                    | N/A                 | N/A                   | N/A               | N/A                |
| Staszewski et al (175), 2020 | 2007–2017 Stony Brook, NY  | Retrospective cohort study (260)  | Methadone vs buprenorphine                            | GA, BW, NAS incidence, morphine to treat NAS, NICU admission, LOS                            | Infant             | Yes                | No                        | 42.3                          | Yes                  | No                     | No                  | N/A                   | N/A               | N/A                |
| Stein et al (176), 2020      | 2003–2009 Massachusetts    | Retrospective cohort study (4584) | Concomitant marijuana and opioid use during pregnancy | GA, LBW, neonatal mortality, NAS, LOS                                                        | Infant             | Yes                | No                        | 15.9                          | Yes                  | Yes                    | No                  | N/A                   | Yes               | No                 |
| Stewart et al (177), 2013    | 2006–2011 Dallas, TX       | Retrospective cohort study (95)   | Opioid detoxification during pregnancy                | Illicit drug use at time of delivery, infant LOS, NAS scores, pharmacologic treatment of NAS | Multiple           | Yes                | No                        | 52.6                          | Yes                  | No                     | No                  | N/A                   | N/A               | N/A                |
| Suifin et al (178), 2020     | 2016–2017 National         | Cross sectional Study (117)       | Pregnant women with OUD in jails or prisons           | Treatment engagement                                                                         | Prenatal/obstetric | Yes                | No                        | Not given                     | No                   | N/A                    | No                  | N/A                   | N/A               | N/A                |

**SUPPLEMENTAL TABLE 5 Continued**

| Study Details               |                                | Outcome                           |                                                                                                        |                                                                                                            | R/E Reporting      |                    |                         | Bivariate Analyses by R/E     |                      |                        | Multivariable Modeling |                       |                   |                    |
|-----------------------------|--------------------------------|-----------------------------------|--------------------------------------------------------------------------------------------------------|------------------------------------------------------------------------------------------------------------|--------------------|--------------------|-------------------------|-------------------------------|----------------------|------------------------|------------------------|-----------------------|-------------------|--------------------|
| Author, Publication Year    | Study Dates, Location          | Type of Study, (N)                | Primary Exposure                                                                                       | Primary                                                                                                    | Category           | Mentioned in Study | Discussed in Discussion | Hispanic and/or Non-White (%) | Analysis of Exposure | Difference in Exposure | Analysis of Outcome    | Difference in Outcome | Adjusted for R/E? | Stratified by R/E? |
| Summey et al (179), 2018    | 2006-2014 Greenville, SC (466) | Program evaluation                | Traditional care vs MAiN program treatment                                                             | Medical and safety outcomes, health services utilization, CPS involvement, emergency services utilization  | Infant             | Yes                | No                      | 6.4                           | Yes                  | No                     | No                     | N/A                   | N/A               | N/A                |
| Taleghani et al (180), 2019 | 2015-2017 National             | Retrospective cohort study (156)  | Pharmacotherapy for NAS with either methadone or buprenorphine                                         | LOS, LOT, cumulative opioid exposure                                                                       | Infant             | No                 | No                      | Not given                     | No                   | N/A                    | N/A                    | N/A                   | N/A               | N/A                |
| Tolia (181), 2018           | 2011-2014 National             | Retrospective cohort study (3364) | Methadone vs buprenorphine prenatal exposure                                                           | LOS                                                                                                        | Infant             | Yes                | No                      | 14                            | Yes                  | Yes                    | Yes                    | Yes                   | Yes               | No                 |
| Towers et al (182), 2020    | 2017-2018 Knoxville, TN (230)  | Prospective cohort study          | Naltrexone during pregnancy                                                                            | Obstetric (mode of delivery, GA, spontaneous delivery), newborn (NAS, LOS, BW, HC)                         | Multiple           | Yes                | No                      | 4.8                           | Yes                  | No                     | No                     | N/A                   | N/A               | N/A                |
| Tuten et al (183), 2009     | 2009 Baltimore, MD (68)        | Retrospective cohort study        | Mood disorder at delivery                                                                              | Mode of delivery, illicit use at delivery, maternal LOS, infant LOS, GA, NICU admission, BW, NAS treatment | Multiple           | Yes                | No                      | 74                            | Yes                  | No                     | No                     | N/A                   | N/A               | N/A                |
| Tuten et al (184), 2018     | 2010-2014 Baltimore, MD (194)  | Randomized controlled trial       | Type of reinforcement-based treatment, early response (ongoing use and treatment retention first 2 wk) | Treatment retention and ongoing use                                                                        | Prenatal/obstetric | Yes                | No                      | 23.2                          | Yes                  | No                     | Yes                    | No                    | N/A               | N/A                |
| Unger et al (185), 2011     | 2005-2008 International (113)  | Retrospective cohort study        | Biological sex                                                                                         | BW, BL, HC, NAS severity, duration, and treatment                                                          | Infant             | Yes                | No                      | 8.8                           | Yes                  | No                     | No                     | N/A                   | N/A               | N/A                |
| Yelez et al (186), 2009     | 2002-2007 Baltimore, MD (77)   | Prospective cohort study          | Methadone exposure, exploratory for maternal factors                                                   | Neurobehavioral function                                                                                   | Infant             | Yes                | No                      | 40                            | No                   | N/A                    | No                     | N/A                   | N/A               | N/A                |
| Vilkins et al (187), 2017   | 2006-2014 Boston, MA (273)     | Retrospective cohort study        | Methadone or buprenorphine treatment                                                                   | Opioid analgesic requirement                                                                               | Postpartum         | No                 | No                      | Not given                     | No                   | N/A                    | N/A                    | N/A                   | N/A               | N/A                |



**SUPPLEMENTAL TABLE 5 Continued**

| Study Details             |                           |                                            | Outcome                                                                                               |                                                                                             | R/E Reporting |                    |                         | Bivariate Analyses by R/E     |                      |                        | Multivariable Modeling |                       |                   |                    |
|---------------------------|---------------------------|--------------------------------------------|-------------------------------------------------------------------------------------------------------|---------------------------------------------------------------------------------------------|---------------|--------------------|-------------------------|-------------------------------|----------------------|------------------------|------------------------|-----------------------|-------------------|--------------------|
| Author, Publication Year  | Study Dates, Location     | Type of Study, (N)                         | Primary Exposure                                                                                      | Primary                                                                                     | Category      | Mentioned in Study | Discussed in Discussion | Hispanic and/or Non-White (%) | Analysis of Exposure | Difference in Exposure | Analysis of Outcome    | Difference in Outcome | Adjusted for R/E? | Stratified by R/E? |
| Wachman (188), 2018       | 2016 Boston, MA           | Program evaluation (186)                   | Pre- or post-quality improvement intervention                                                         | LOS due to NAS                                                                              | Infant        | Yes                | No                      | 15.1                          | Yes                  | No                     | No                     | N/A                   | N/A               | N/A                |
| Wachman et al (189), 2011 | 2003–2009 Boston, MA      | Retrospective cohort study (273)           | Concurrent psychiatric medication with MOUD during pregnancy                                          | Infant LOS                                                                                  | Infant        | No                 | No                      | Not given                     | No                   | N/A                    | N/A                    | N/A                   | N/A               | N/A                |
| Wachman et al (190), 2010 | 2003–2009 Boston, MA      | Retrospective cohort study (276)           | Infants with MAS, exploratory for maternal factors                                                    | Breastfeeding eligibility, initiation, length of breastfeeding                              | Infant        | No                 | No                      | Not given                     | No                   | N/A                    | N/A                    | N/A                   | N/A               | N/A                |
| Wachman et al (191), 2018 | 2006–2015 Boston, MA      | Retrospective cohort study (744)           | Psychiatric coexposure with opioids                                                                   | MAS outcomes (pharmacologic treatment, adjunct treatment, LOS, LOT)                         | Infant        | Yes                | No                      | 14                            | No                   | N/A                    | No                     | N/A                   | N/A               | N/A                |
| Walsh et al (192), 2018   | 2014–2015 Ohio            | Program evaluation (3266)                  | Quality improvement intervention                                                                      | Pharmacologic treatment, LOS, LOT                                                           | Infant        | No                 | No                      | Not given                     | No                   | N/A                    | N/A                    | N/A                   | N/A               | N/A                |
| Wang et al (193), 2019    | 2008–2014 Birmingham, AL  | Systematic Review with meta-analysis (300) | Opioid detoxification during pregnancy                                                                | Maternal abstinence at delivery, MAS, stillbirth, GA                                        | Infant        | No                 | No                      | Not given                     | No                   | N/A                    | N/A                    | N/A                   | N/A               | N/A                |
| Wiegand et al (194), 2015 | 2011–2013 Chapel Hill, NC | Retrospective cohort study (62)            | Buprenorphine/naloxone vs methadone treatment                                                         | MAS incidence, peak NAS score, morphine (mg) to treat NAS, LOT for NAS                      | Infant        | Yes                | No                      | 17.7                          | Yes                  | No                     | No                     | N/A                   | N/A               | N/A                |
| Wilder et al (195), 2017  | 2006–2013 Cincinnati, OH  | Retrospective cohort study (189)           | Methadone dose                                                                                        | Treatment retention at delivery and postpartum, ongoing use during pregnancy and postpartum | Multiple      | Yes                | No                      | 2.1                           | Yes                  | No                     | No                     | N/A                   | N/A               | N/A                |
| Wilder et al (41), 2015   | 2006–2013 Cincinnati, OH  | Retrospective cohort study (251)           | Methadone treatment of OUD during pregnancy or postpartum, exploratory for factors of discontinuation | MOUD discontinuation                                                                        | Multiple      | Yes                | Yes                     | 2.6                           | No                   | N/A                    | No                     | N/A                   | N/A               | N/A                |

SUPPLEMENTAL TABLE 5 Continued

| Study Dates, Location       |                           | Type of Study, (N)                             |                    | Primary Exposure                                          |                                                                               | Outcome            |                    | R/E Reporting           |                               |                      | Bivariate Analyses by R/E |                     |                       | Multivariable Modeling |                    |
|-----------------------------|---------------------------|------------------------------------------------|--------------------|-----------------------------------------------------------|-------------------------------------------------------------------------------|--------------------|--------------------|-------------------------|-------------------------------|----------------------|---------------------------|---------------------|-----------------------|------------------------|--------------------|
| Author, Publication Year    | Location                  | Study Dates, Location                          | Type of Study, (N) | Primary Exposure                                          | Primary Outcome                                                               | Category           | Mentioned in Study | Discussed in Discussion | Hispanic and/or Non-White (%) | Analysis of Exposure | Difference in Exposure    | Analysis of Outcome | Difference in Outcome | Adjusted for R/E?      | Stratified by R/E? |
| Winkelman et al (60), 2018  | 2004–2014 National        | Cross sectional Study (55 629)                 |                    | Medicaid vs private insurance                             | Transfer to another hospital, LOS                                             | Infant             | No                 | No                      | Not given                     | No                   | N/A                       | N/A                 | N/A                   | N/A                    | N/A                |
| Winkelman et al (196), 2020 | 1992–2017 National        | Cross sectional Study (131 838)                |                    | Criminal justice referral pre- or post-Medicaid expansion | MOUD receipt                                                                  | Prenatal/obstetric | Yes                | No                      | 33.5                          | Yes                  | Yes                       | No                  | N/A                   | Yes                    | N/A                |
| Wong et al (197), 2018      | 2000–2016 Seattle, WA     | Retrospective cohort study (88)                |                    | Buprenorphine exposure/dose                               | NAS incidence, pharmacologic treatment, LOS, LOT                              | Infant             | No                 | No                      | Not given                     | No                   | N/A                       | N/A                 | N/A                   | N/A                    | N/A                |
| Wunsch (198), 2006          | 2001 Richmond, VA         | Retrospective cohort study (73)                |                    | Paregomic vs methadone for NAS                            | Time to resolution of NAS, rate of decrease of symptom severity, LOS          | Infant             | No                 | No                      | Not given                     | No                   | N/A                       | N/A                 | N/A                   | N/A                    | N/A                |
| Yonke et al (199), 2020     | 2017–2018 Albuquerque, NM | Cross sectional Study (40)                     |                    | Exploratory                                               | Breastfeeding                                                                 | Infant             | Yes                | No                      | 77.5                          | N/A                  | N/A                       | Yes                 | No                    | N/A                    | N/A                |
| Yonke et al (200), 2019     | 2011–2015 Albuquerque, NM | Retrospective cohort study (228)               |                    | Buprenorphine or methadone                                | Breastfeeding compared with breastfeeding intention                           | Infant             | Yes                | No                      | 82.5                          | Yes                  | No                        | No                  | N/A                   | N/A                    | N/A                |
| Young et al (201), 2015     | 2010–2011 Columbus, OH    | Retrospective cohort study (26)                |                    | Morphine vs methadone to treat NAS                        | LOS                                                                           | Infant             | No                 | No                      | Not given                     | No                   | N/A                       | N/A                 | N/A                   | N/A                    | N/A                |
| Zedler et al (202), 2016    | 2016 Multiple sites       | Systematic review with meta-analysis (unknown) |                    | Buprenorphine or methadone during pregnancy               | GA, BW, HC, spontaneous fetal death, fetal/congenital anomalies, fetal growth | Infant             | No                 | No                      | Not given                     | No                   | N/A                       | N/A                 | N/A                   | N/A                    | N/A                |

Agar, appearance, pulse, grimace, activity, and respiration; BL, body length; BW, birth weight; CPS, child protective services; EI, early intervention; EMPOWER, Engaging Mothers for Positive Outcomes with Early Referrals; GA, gestational age; HC, head circumference; HCV, hepatitis C virus; LARC, long-acting reversible contraception; LBW, low birth weight; LOS, length of stay; LOT, length of pharmacologic treatment; MAIN, Managing Abstinence in Newborns; N/A, not applicable; PRN, as needed; PTB, preterm birth; R/E, race/ethnicity; SGA, small for gestational age; SSRI, selective serotonin reuptake inhibitor; UDS, urine drug screen.

**SUPPLEMENTAL TABLE 6** Qualitative Study Data

| Authors, Year               | Study Dates (M)           | Type of Study                                                           | Major Eligibility                                                                                              | Primary Aim/Outcome                                                                                                                                                             | Latinx and/or Non-White (%)                                            | Notes on Race/Ethnicity                                                                                                                                                                                           |
|-----------------------------|---------------------------|-------------------------------------------------------------------------|----------------------------------------------------------------------------------------------------------------|---------------------------------------------------------------------------------------------------------------------------------------------------------------------------------|------------------------------------------------------------------------|-------------------------------------------------------------------------------------------------------------------------------------------------------------------------------------------------------------------|
| Alexander et al (203), 2020 | 2019 (22)                 | Semistructured focus groups                                             | Patients at perinatal OUD treatment center                                                                     | Identify and describe perceptions of birth and newborn health care experiences among a population of women in treatment of OUD to improve the delivery of perinatal health care | 50                                                                     | No mention of race/ethnicity beyond reporting demographics                                                                                                                                                        |
| Atwood et al (204), 2016    | 2013–2014 (20)            | Semistructured interviews                                               | Families of newborns with NAS at hospital discharge                                                            | Understand experience of newborn hospitalization for NAS, to improve family-centered care                                                                                       | 0                                                                      | Homogenous sample of White families listed as a limitation of study                                                                                                                                               |
| Cleveland et al (49), 2016  | 2016 (15)                 | Semistructured individual interviews                                    | Mothers with SUD during pregnancy                                                                              | Describe the mothering experience of women with SUDs                                                                                                                            | 100                                                                    | Authors noted lack of ethnic diversity as limitation, as all participants were Hispanic; attributed this to geographic location and encourage future research in the area to represent a variety of ethnic groups |
| Demirci et al (205), 2015   | 2005–2006, 2008–2009 (11) | Semistructured interviews and focus groups                              | Pregnant and postpartum women on methadone                                                                     | Perceptions around breastfeeding decision among pregnant and postpartum women on methadone                                                                                      | 0                                                                      | No mention of race beyond reporting percentage of non-Latinx White subjects; listed small convenience sample from single geographic area as a generalizability limitation, but no mention of race/ethnicity here  |
| Falletta et al (206), 2018  | 2012 (16)                 | Semistructured interviews                                               | Pregnant or postpartum women with abuse/dependence of pharmaceutical opioids at a drug treatment facility      | Perceptions of child welfare services among pregnant and postpartum women using opioids                                                                                         | 37.5                                                                   | No mention of race beyond reporting demographics                                                                                                                                                                  |
| Goodman et al (207), 2020   | 2015–2016 (10)            | Semistructured interviews                                               | Postpartum women who were successfully engaged in both substance use treatment and maternity care in pregnancy | Experiences of postpartum women with OUD, to understand factors contributing to their ability to access substance use and maternity care and social support                     | Not given, participants were non-Latinx White or White/American Indian | No mention beyond reporting demographics                                                                                                                                                                          |
| Hahn et al (208), 2016      | 2016 (8)                  | Interviews                                                              | Mothers of infants with NAS                                                                                    | Impact of infant massage on both the behaviors of infants with NAS and the mothers' relationships with their babies                                                             | Not given                                                              | Race/ethnicity not mentioned                                                                                                                                                                                      |
| Hicks et al (209), 2018     | 2015 (30)                 | Cross-sectional qualitative/quantitative interviews<br>Group interviews | Postpartum women on methadone                                                                                  | Breastfeeding practices and barriers for women on methadone                                                                                                                     | 3.3                                                                    | Majority White study population listed as limitation in discussion                                                                                                                                                |
|                             |                           |                                                                         |                                                                                                                |                                                                                                                                                                                 | 0                                                                      |                                                                                                                                                                                                                   |

| Authors, Year                   | Study Dates (M) | Type of Study                                                                        | Major Eligibility                                                                                              | Primary Aim/Outcome                                                                                                                                         | Latinx and/or Non-White (%) | Notes on Race/Ethnicity                                                                                                                                                                                                                                                                                        |
|---------------------------------|-----------------|--------------------------------------------------------------------------------------|----------------------------------------------------------------------------------------------------------------|-------------------------------------------------------------------------------------------------------------------------------------------------------------|-----------------------------|----------------------------------------------------------------------------------------------------------------------------------------------------------------------------------------------------------------------------------------------------------------------------------------------------------------|
| Howard (210), 2016              | 2013–2014 (30)  |                                                                                      | Postpartum women with OUD (primary drug of choice prescription medications and synthetic narcotics or on MOUD) | The role of pregnant women with an OUD participating in medical decision-making regarding their prenatal care while addressing their addiction              |                             | In introduction, authors mentioned feminist theory that factors, including ethnicity, contribute to identity and access to treatment options as well as that economically disadvantaged women may be intimidated by status of physician, including typical White race; authors referenced power differentials. |
| Howard et al (211), 2018        | 2017–2018 (25)  | In-depth qualitative interviews                                                      | Mothers with OUD 12 wk after delivery                                                                          | Investigate perspectives of mothers with OUD regarding breastfeeding and rooming-in during the birth hospitalization and identify facilitators and barriers | 0                           | 100% non-Latinx White population mentioned in limitations section                                                                                                                                                                                                                                              |
| Jackson and Shannon (212), 2012 | 2005–2007 (85)  | Interviews and quantitative analysis comparing demographics to barriers to treatment | Rural pregnant women with SUD (86% opiate)                                                                     | Barriers for rural pregnant women seeking substance use treatment                                                                                           | 3.5 non-White<br>2.4 Latinx | Noted that more racial diversity would have strengthen comparisons                                                                                                                                                                                                                                             |
| Mattocks et al (213), 2017      | 2017 (14)       | Focus groups                                                                         | Pregnant and postpartum women on methadone                                                                     | Experiences and challenges with methadone treatment and obstetrical care                                                                                    | 20                          | No mention of race beyond reporting demographics                                                                                                                                                                                                                                                               |
| McGlothen et al (48), 2018      | 2015 (8)        | Semistructured interviews                                                            | Mothers receiving MOUD during postpartum period                                                                | Describe what influences the infant feeding decisions of women taking MOUD                                                                                  | 88                          | Noted in methods, largely Hispanic local population                                                                                                                                                                                                                                                            |
| Ostrach and Leiner (214), 2019  | 2017–2018 (27)  | Interviews                                                                           | Patients receiving comprehensive perinatal substance use treatment and on buprenorphine                        | Patients' ambivalence about MOUD in context of stigma/judgment                                                                                              | 3.7                         | In introduction, authors mentioned that different MOUD are racialized differently                                                                                                                                                                                                                              |
| Rizzo et al (215), 2014         | 2012–2013 (32)  | Observation qualitative and quantitative method study, semistructured interviews     | Pregnant women on buprenorphine for prescription opioid dependence                                             | Parenting skills and concerns                                                                                                                               | 18.7                        | No mention other than reporting demographics                                                                                                                                                                                                                                                                   |
| Rockefeller et al (216), 2019   | 2017–2018 (13)  | Semistructured interviews                                                            | Mothers of infants with NAS                                                                                    | Mothers' experiences of, supports for, and barriers to bonding with infants with NAS                                                                        | 16 non-White<br>8 Latinx    | Suggested studies of racially diverse populations in discussion                                                                                                                                                                                                                                                |
| Scott et al (217), 2017         | 2007–2012 (11)  | Semistructured interviews                                                            | Women with histories of opioid use who experience fetal or infant loss                                         | Care experiences of women who used prescription or illicit opioids and experiences fetal or infant loss                                                     | 28                          | No mention of race/ethnicity beyond reporting demographics                                                                                                                                                                                                                                                     |

## SUPPLEMENTAL REFERENCES

81. Agthe AG, Kim GR, Mathias KB, et al. Clonidine as an adjunct therapy to opioids for neonatal abstinence syndrome: a randomized, controlled trial. *Pediatrics*. 2009;123(5):e849–e856
82. Angelotta C, Weiss CJ, Angelotta JW, Friedman RA. A moral or medical problem? The relationship between legal penalties and treatment practices for opioid use disorders in pregnant women. *Womens Health Issues*. 2016;26(6):595–601
83. Bachhuber MA, Mehta PK, Faherty LJ, Saloner B. Medicaid coverage of methadone maintenance and the use of opioid agonist therapy among pregnant women in specialty treatment. *Med Care*. 2017;55(12):985–990
84. Backes CH, Backes CR, Gardner D, Nankervis CA, Giannone PJ, Cordero L. Neonatal abstinence syndrome: transitioning methadone-treated infants from an inpatient to an outpatient setting. *J Perinatol*. 2012;32(6):425–430
85. Berghella V, Lim PJ, Hill MK, Cherpes J, Chennat J, Kaltenbach K. Maternal methadone dose and neonatal withdrawal. *Am J Obstet Gynecol*. 2003;189(2):312–317
86. Bhatt-Mehta V, Richards J, Sturza J, Schumacher RE. Impact of In-utero Exposure to Selective Serotonin Reuptake Inhibitors and Opioids on Neonatal Opioid Withdrawal Syndrome. *J Addict Med*. 2019;13(3):227–234
87. Bivin B, Waring A, Alves P. Buprenorphine compared with methadone in opioid-dependent pregnant women: How does it affect neonatal abstinence syndrome? *J Am Assoc Nurse Pract*. 2019;33(2):119–125
88. Bogen DL, Hanusa BH, Baker R, Medoff-Cooper B, Cohlman B. Randomized clinical trial of standard- versus high-calorie formula for methadone-exposed infants: a feasibility study. *Hosp Pediatr*. 2018;8(1):7–14
89. Bracero LA, Subit M, Seybold DJ, Vargo M, Broce M. Relationship between methadone, selective serotonin reuptake inhibitors, and neonatal abstinence syndrome. *J Reprod Med*. 2016;61(9-10):463–468
90. Brogly SB, Saia KE, Werler MM, Regan E, Hernández-Díaz S. Prenatal treatment and outcomes of women with opioid use disorder. *Obstet Gynecol*. 2018;132(4):916–922
91. Brogly SB, Saia KA, Walley AY, Du HM, Sebastiani P. Prenatal buprenorphine versus methadone exposure and neonatal outcomes: systematic review and meta-analysis. *Am J Epidemiol*. 2014;180(7):673–686
92. Chavan NR, Ashford KB, Wiggins AT, Lofwall MR, Critchfield AS. Buprenorphine for medication-assisted treatment of opioid use disorder in pregnancy: relationship to neonatal opioid withdrawal syndrome. *AJP Rep*. 2017;7(4):e215–e222
93. Chisolm MS, Acquavita SP, Kaltenbach K, et al. Cigarette smoking and neonatal outcomes in depressed and non-depressed opioid-dependent agonist-maintained pregnant patients. *Addict Disord Their Treat*. 2011;10(4):180–187
94. Choo RE, Huestis MA, Schroeder JR, Shin AS, Jones HE. Neonatal abstinence syndrome in methadone-exposed infants is altered by level of prenatal tobacco exposure. *Drug Alcohol Depend*. 2004;75(3):253–260
95. Chung EK, Short VL, Hand DJ, Gubernick RS, Abatemarco DJ. Poor prenatal care does not predict well child care for children born to mothers with opioid use disorder. *J Subst Use*. 2020;25(5):482–498
96. Cochran GT, Hruschak V, Abdullah W, et al. Optimizing Pregnancy Treatment Interventions for Moms (OPTI-Mom): A Pilot Study. *J Addict Med*. 2018;12(1):72–79 <https://doi.org/10.1097/adm.0000000000000370>
97. Coker JL, Catlin D, Ray-Griffith S, Knight B, Stowe ZN. Buprenorphine medication-assisted treatment during pregnancy: an exploratory factor analysis associated with adherence. *Drug Alcohol Depend*. 2018;192:146–149
98. Collier KW, MacAfee LK, Kenny BM, Meyer MC. Does co-location of medication assisted treatment and prenatal care for women with opioid use disorder increase pregnancy planning, length of interpregnancy interval, and postpartum contraceptive uptake? *J Subst Abuse Treat*. 2019;98:73–77
99. Coulson CC, Lorencz E, Rittenhouse K, Ramage M, Lorenz K, Galvin SL. Association of maternal buprenorphine or methadone dose with fetal growth indices and neonatal abstinence syndrome. *Am J Perinatol*. 2021;38(1):28–36
100. Coyle MG, Salisbury AL, Lester BM, et al. Neonatal neurobehavior effects following buprenorphine versus methadone exposure. *Addiction*. 2012;107(suppl 1):63–73
101. Crane D, Marcotte M, Applegate M, et al. A statewide quality improvement (QI) initiative for better health outcomes and family stability among pregnant women with opioid use disorder (OUD) and their infants. *J Subst Abuse Treat*. 2019;102:53–59
102. Davis JM, Shenberger J, Terrin N, et al. Comparison of safety and efficacy of methadone vs morphine for treatment of neonatal abstinence syndrome: a randomized clinical trial. *JAMA Pediatr*. 2018;172(8):741–748
103. DeAtley HN, Burton A, Fraley MD, Haltom J. Evaluation of the effectiveness of two morphine protocols to treat neonatal abstinence syndrome in a level II nursery in a community hospital. *Pharmacotherapy*. 2017;37(7):856–860
104. Ellis JD, Cairncross M, Struble CA, Carr MM, Ledgerwood DM, Lundahl LH. Correlates of treatment retention and opioid misuse among postpartum women in methadone treatment. *J Addict Med*. 2019;13(2):153–158
105. Gaalema DE, Heil SH, Badger GJ, Metayer JS, Johnston AM. Time to initiation of treatment for neonatal abstinence syndrome in neonates exposed in utero to buprenorphine or methadone. *Drug Alcohol Depend*. 2013;133(1):266–269
106. Gaalema DE, Scott TL, Heil SH, et al. Differences in the profile of neonatal abstinence syndrome signs in methadone- versus buprenorphine-exposed neonates. *Addiction*. 2012;107(suppl 1):53–62
107. Gawronski KM, Prasad MR, Backes CR, Lehman KJ, Gardner DK, Cordero L. Neonatal outcomes following in utero exposure to buprenorphine/

- naloxone or methadone. *SAGE Open Med.* 2014;2:2050312114530282
108. Gibson KS, Stark S, Kumar D, Bailit JL. The relationship between gestational age and the severity of neonatal abstinence syndrome. *Addiction.* 2017;112(4):711–716 <https://doi.org/10.1111/add.13703>
  109. Gressler LE, Shah S, Shaya FT. Association of criminal statutes for opioid use disorder with prevalence and treatment among pregnant women with commercial insurance in the United States. *JAMA Netw Open.* 2019;2(3):e190338
  110. Grossman MR, Berkowitz AK, Osborn RR, et al. An initiative to improve the quality of care of infants with neonatal abstinence syndrome. *Pediatrics.* 2017;139(6):e20163360
  111. Heller NA, Logan BA, Morrison DG, Paul JA, Brown MS, Hayes MJ. Neonatal abstinence syndrome: neurobehavior at 6 weeks of age in infants with or without pharmacological treatment for withdrawal. *Dev Psychobiol.* 2017;59(5):574–582
  112. Hensley L, Sulo S, Kozmic S, Parilla BV. Opioid addiction in pregnancy: does depression negatively impact adherence with prenatal care? *J Addict Med.* 2018;12(1):61–64
  113. Holbrook A, Kaltenbach K. Gender and NAS: does sex matter? *Drug Alcohol Depend.* 2010;112(1-2):156–159
  114. Holbrook A, Kaltenbach K. Co-occurring psychiatric symptoms in opioid-dependent women: the prevalence of antenatal and postnatal depression. *Am J Drug Alcohol Abuse.* 2012;38(6):575–579
  115. Holbrook AM, Baxter JK, Jones HE, et al. Infections and obstetric outcomes in opioid-dependent pregnant women maintained on methadone or buprenorphine. *Addiction.* 2012;107(suppl 1):83–90
  116. Holmes AV, Atwood EC, Whalen B, et al. Rooming-in to treat neonatal abstinence syndrome: improved family-centered care at lower cost. *Pediatrics.* 2016;137(6):e20152929
  117. Howard MB, Schiff DM, Penwill N, et al. Impact of parental presence at infants' bedside on neonatal abstinence syndrome. *Hosp Pediatr.* 2017;7(2):63–69
  118. Isemann B, Meinen-Derr J, Akinbi H. Maternal and neonatal factors impacting response to methadone therapy in infants treated for neonatal abstinence syndrome. *J Perinatol.* 2011;31(1):25–29
  119. Isemann BT, Stoeckle EC, Taleghani AA, Mueller EW. Early prediction tool to identify the need for pharmacotherapy in infants at risk of neonatal abstinence syndrome. *Pharmacotherapy.* 2017;37(7):840–848
  120. Jansson LM, Velez ML, McConnell K, et al. Maternal buprenorphine treatment and infant outcome. *Drug Alcohol Depend.* 2017;180:56–61
  121. Jansson LM, Dipietro JA, Elko A, Velez M. Maternal vagal tone change in response to methadone is associated with neonatal abstinence syndrome severity in exposed neonates. *J Matern Fetal Neonatal Med.* 2007;20(9):677–685
  122. Jansson LM, Dipietro JA, Elko A, Velez M. Infant autonomic functioning and neonatal abstinence syndrome. *Drug Alcohol Depend.* 2010;109(1–3):198–204
  123. John McConnell K, Kaufman MR, Grunditz JI, et al. Project nurture integrates care and services to improve outcomes for opioid-dependent mothers and their children. *Health Aff (Millwood).* 2020;39(4):595–602
  124. Jones HE, Johnson RE, Jasinski DR, et al. Buprenorphine versus methadone in the treatment of pregnant opioid-dependent patients: effects on the neonatal abstinence syndrome. *Drug Alcohol Depend.* 2005;79(1):1–10
  125. Jones HE, Dengler E, Garrison A, et al. Neonatal outcomes and their relationship to maternal buprenorphine dose during pregnancy. *Drug Alcohol Depend.* 2014;134:414–417
  126. Jones HE, Jansson LM, O'Grady KE, Kaltenbach K. The relationship between maternal methadone dose at delivery and neonatal outcome: methodological and design considerations. *Neurotoxicol Teratol.* 2013;39:110–115
  127. Jones HE, Heil SH, Tuten M, et al. Cigarette smoking in opioid-dependent pregnant women: neonatal and maternal outcomes. *Drug Alcohol Depend.* 2013;131(3):271–277
  128. Jones HE, Kaltenbach K, Heil SH, et al. Neonatal abstinence syndrome after methadone or buprenorphine exposure. *N Engl J Med.* 2010;363(24):2320–2331
  129. Kaltenbach K, O'Grady KE, Heil SH, et al. Prenatal exposure to methadone or buprenorphine: Early childhood developmental outcomes. *Drug Alcohol Depend.* 2018;185:40–49
  130. Kaltenbach K, Holbrook AM, Coyle MG, et al. Predicting treatment of neonatal abstinence syndrome in infants born to women maintained on opioid agonist medication. *Addiction.* 2012;107(suppl 1):45–52
  131. Knittel AK, Zarnick S, Thorp JM Jr, Amos E, Jones HE. Medications for opioid use disorder in pregnancy in a state women's prison facility. *Drug Alcohol Depend.* 2020;214:108159
  132. Kotha A, Chen BA, Lewis L, Dunn S, Himes KP, Krans EE. Prenatal intent and postpartum receipt of long-acting reversible contraception among women receiving medication-assisted treatment for opioid use disorder. *Contraception.* 2019;99(1):36–41
  133. Kraft WK, Dysart K, Greenspan JS, Gibson E, Kaltenbach K, Ehrlich ME. Revised dose schema of buprenorphine in the treatment of the neonatal opioid abstinence syndrome. *Addiction.* 2011;106(3):574–580
  134. Kraft WK, Adeniyi-Jones SC, Chervoneva I, et al. Buprenorphine for the treatment of the neonatal abstinence syndrome. *N Engl J Med.* 2017;376(24):2341–2348
  135. Krans EE, Bogen D, Richardson G, Park SY, Dunn SL, Day N. Factors associated with buprenorphine versus methadone use in pregnancy. *Subst Abuse.* 2016;37(4):550–557
  136. Krans EE, Zickmund SL, Rustgi VK, Park SY, Dunn SL, Schwarz EB. Screening and evaluation of hepatitis C virus infection in pregnant women on opioid maintenance therapy: a retrospective cohort study. *Subst Abuse.* 2016;37(1):88–95
  137. Kreitinger C, Gutierrez H, Hamidovic A, et al. The effect of prenatal alcohol



- co-exposure on neonatal abstinence syndrome in infants born to mothers in opioid maintenance treatment. *Matern Fetal Neonatal Med.* 2016;29(5):783–788
138. Lander LR, Gurka KK, Marshalek PJ, Riffon M, Sullivan CR. A comparison of pregnancy-only versus mixed-gender group therapy among pregnant women with opioid use disorder. *Soc Work Res.* 2015;39(4):235–244
  139. Lee J, Hulman S, Musci M Jr, Stang E. Neonatal abstinence syndrome: influence of a Combined inpatient/outpatient methadone treatment regimen on the average length of stay of a Medicaid NICU population. *Popul Health Manag.* 2015;18(5):392–397
  140. Lim S, Prasad MR, Samuels P, Gardner DK, Cordero L. High-dose methadone in pregnant women and its effect on duration of neonatal abstinence syndrome. *Am J Obstet Gynecol.* 2009;200(1):70.e1–70.e5
  141. Liu WF, Singh K, Faisal M, Li S. Maternal methadone treatment and neonatal abstinence syndrome. *Am J Perinatol.* 2015;32(11):1078–1086
  142. Lund IO, Fitzsimons H, Tuten M, Chisolm MS, O'Grady KE, Jones HE. Comparing methadone and buprenorphine maintenance with methadone-assisted withdrawal for the treatment of opioid dependence during pregnancy: maternal and neonatal outcomes. *Subst Abuse Rehabil.* 2012;3(suppl 1):17–25
  143. McCarthy JJ, Leamon MH, Stenson G, Biles LA. Outcomes of neonates conceived on methadone maintenance therapy. *J Subst Abuse Treat.* 2008;35(2):202–206
  144. McCarthy JJ, Leamon MH, Willits NH, Salo R. The effect of methadone dose regimen on neonatal abstinence syndrome. *J Addict Med.* 2015;9(2):105–110
  145. McCarthy JJ, Leamon MH, Parr MS, Anania B. High-dose methadone maintenance in pregnancy: maternal and neonatal outcomes. *Am J Obstet Gynecol.* 2005;193(3 pt 1):606–610
  146. McDaniel CE, Test M, Deodhar P, Jennings R, Bove J, Carlin K. Effects of polysubstance exposure on neonatal outcomes for infants with intrauterine opioid exposure. *J Perinatol.* 2020;40(10):1489–1496
  147. McNicholas LF, Holbrook AM, O'Grady KE, et al. Effect of hepatitis C virus status on liver enzymes in opioid-dependent pregnant women maintained on opioid-agonist medication. *Addiction.* 2012;107(suppl 1):91–97
  148. Meyer M, Benvenuto A, Howard D, et al. Development of a substance abuse program for opioid-dependent nonurban pregnant women improves outcome. *J Addict Med.* 2012;6(2):124–130
  149. Meyer MC, Johnston AM, Crocker AM, Heil SH. Methadone and buprenorphine for opioid dependence during pregnancy: a retrospective cohort study. *J Addict Med.* 2015;9(2):81–86
  150. Mitchell ST, Costello TJ, Nedderman KM. Comparison of time to first dose of oral morphine in the treatment of neonatal abstinence syndrome. *Pharmacotherapy.* 2017;37(7):849–855
  151. Mullins N, Galvin SL, Ramage M, et al. Buprenorphine and naloxone versus buprenorphine for opioid use disorder in pregnancy: a cohort study. *J Addict Med.* 2020;14(3):185–192
  152. Napolitano A, Theophilopoulos D, Seng SK, Calhoun DA. Pharmacologic management of neonatal abstinence syndrome in a community hospital. *Clin Obstet Gynecol.* 2013;56(1):193–201
  153. O'Connor AB, Collett A, Alto WA, O'Brien LM. Breastfeeding rates and the relationship between breastfeeding and neonatal abstinence syndrome in women maintained on buprenorphine during pregnancy. *J Midwifery Womens Health.* 2013;58(4):383–388
  154. O'Connor AB, O'Brien L, Alto WA, Wong J. Does concurrent in utero exposure to buprenorphine and antidepressant medications influence the course of neonatal abstinence syndrome? *J Matern Fetal Neonatal Med.* 2016;29(1):112–114
  155. O'Connor AB, O'Brien L, Alto WA. Maternal buprenorphine dose at delivery and its relationship to neonatal outcomes. *Eur Addict Res.* 2016;22(3):127–130
  156. O'Connor AB, Kelly BK, O'Brien LM. Maternal and infant outcomes following third trimester exposure to marijuana in opioid dependent pregnant women maintained on buprenorphine. *Drug Alcohol Depend.* 2017;180:200–203
  157. O'Connor AB, O'Brien L, Alto WA. Are there gender related differences in neonatal abstinence syndrome following exposure to buprenorphine during pregnancy? *J Perinat Med.* 2013;41(5):621–623
  158. Parlamán J, Deodhar P, Sanders V, Jerome J, McDaniel C. Improving care for infants with neonatal abstinence syndrome: a multicenter, community hospital-based study. *Hosp Pediatr.* 2019;9(8):608–614
  159. Parlett L, Agiro A, Brown S, et al. Drivers of hospital length of stay in Medicaid and commercially insured mother-infant pairs with a diagnosis of neonatal abstinence syndrome. *Med Care.* 2019;57(12):977–983
  160. Parlier AB, Fagan B, Ramage M, Galvin S. Prenatal care, pregnancy outcomes, and postpartum birth control plans among pregnant women with opiate addictions. *South Med J.* 2014;107(11):676–683
  161. Paterno MT, Jablonski L, Klepacki A, Friedmann PD. Evaluation of a nurse-led program for rural pregnant women with opioid use disorder to improve maternal-neonatal outcomes. *J Obstet Gynecol Neonatal Nurs.* 2019;48(5):495–506
  162. Peacock-Chambers E, Leyenaar JK, Foss S, et al. Early intervention referral and enrollment among infants with neonatal abstinence syndrome. *J Dev Behav Pediatr.* 2019;40(6):441–450
  163. Pizarro D, Habli M, Grier M, Bombrys A, Sibai B, Livingston J. Higher maternal doses of methadone does not increase neonatal abstinence syndrome. *J Subst Abuse Treat.* 2011;40(3):295–298
  164. Pritham UA, Paul JA, Hayes MJ. Opioid dependency in pregnancy and length of stay for neonatal abstinence syndrome. *J Obstet Gynecol Neonatal Nurs.* 2012;41(2):180–190
  165. Rose-Jacobs R, Trevino-Talbot M, Lloyd-Travaglini C, et al. Could prenatal food insecurity influence neonatal

- abstinence syndrome severity? *Addiction*. 2019;114(2):337–343
166. Roth D, Loudin S, Andrews L, Evans J, Davies TH. Inclusion of positive self-reporting by mothers of substance exposed neonates increases the predictability of NAS severity over toxicology alone. *Matern Child Health J*. 2020;24(3):340–350
  167. Sanlorenzo LA, Cooper WO, Dudley JA, Stratton S, Maalouf FI, Patrick SW. Increased severity of neonatal abstinence syndrome associated with concomitant antenatal opioid and benzodiazepine exposure. *Hosp Pediatr*. 2019;9(8):569–575
  168. Saunders C, King T, Smith S, et al; Neonatal Abstinence Syndrome Task Force of East Tennessee Children's Hospital. Neonatal abstinence syndrome: evaluating the effectiveness of an evidence-based multidisciplinary care approach. *J Perinat Neonatal Nurs*. 2014;28(3):232–240
  169. Schauberg CW, Borgert AJ, Bearwald B. Continuation in treatment and maintenance of custody of newborns after delivery in women with opioid use disorder. *J Addict Med*. 2020;14(2):119–125
  170. Schiff DM, Nielsen T, Terplan M, et al. Fatal and nonfatal overdose among pregnant and postpartum women in Massachusetts. *Obstet Gynecol*. 2018;132(2):466–474
  171. Seligman NS, Salva N, Hayes EJ, Dysart KC, Pequignot EC, Baxter JK. Predicting length of treatment for neonatal abstinence syndrome in methadone-exposed neonates. *Am J Obstet Gynecol*. 2008;199(4):396.e1–396.e7
  172. Seligman NS, Almario CV, Hayes EJ, Dysart KC, Berghella V, Baxter JK. Relationship between maternal methadone dose at delivery and neonatal abstinence syndrome. *J Pediatr*. 2010;157(3):428–433.e1
  173. Short VL, Hand DJ, MacAfee L, Abate-marco DJ, Terplan M. Trends and disparities in receipt of pharmacotherapy among pregnant women in publicly funded treatment programs for opioid use disorder in the United States. *J Subst Abuse Treat*. 2018;89:67–74
  174. Singh R, Rothstein R, Ricci K, et al. Partnering with parents to improve outcomes for substance exposed newborns—a pilot program. *J Perinatol*. 2020;40(7):1041–1049
  175. Staszewski CL, Garretto D, Garry ET, Ly V, Davis JA, Herrera KM. Comparison of buprenorphine and methadone in the management of maternal opioid use disorder in full term pregnancies. *J Perinat Med*. 2020;48(7):677–680
  176. Stein Y, Hwang S, Liu CL, Diop H, Wymore E. The association of concomitant maternal marijuana use on health outcomes for opioid exposed newborns in Massachusetts, 2003–2009. *J Pediatr*. 2020;218:238–242
  177. Stewart RD, Nelson DB, Adhikari EH, et al. The obstetrical and neonatal impact of maternal opioid detoxification in pregnancy. *Am J Obstet Gynecol*. 2013;209(3):267.e1–267.e5
  178. Sufrin C, Sutherland L, Beal L, Terplan M, Latkin C, Clarke JG. Opioid use disorder incidence and treatment among incarcerated pregnant women in the United States: results from a national surveillance study. *Addiction*. 2020;115(11):2057–2065
  179. Summey J, Chen L, Mayo R, et al. Early treatment innovation for opioid-dependent newborns: a retrospective comparison of outcomes, utilization, quality, and safety, 2006–2014. *Jt Comm J Qual Patient Saf*. 2018;44(6):312–320
  180. Taleghani AA, Isemann BT, Rice WR, Ward LP, Wedig KE, Akinbi HT. Buprenorphine pharmacotherapy for the management of neonatal abstinence syndrome in methadone-exposed neonates. *Paediatr Neonatal Pain*. 2019;1(2):33–38
  181. Tolia VN, Murthy K, Bennett MM, et al. Antenatal methadone vs buprenorphine exposure and length of hospital stay in infants admitted to the intensive care unit with neonatal abstinence syndrome. *J Perinatol*. 2018;38(1):75–79
  182. Towers CV, Katz E, Weitz B, Visconti K. Use of naltrexone in treating opioid use disorder in pregnancy. *Am J Obstet Gynecol*. 2020;222(1):83.e1–83.e8
  183. Tuten M, Heil SH, O'Grady KE, Fitzsimons H, Chisolm MS, Jones HE. The impact of mood disorders on the delivery and neonatal outcomes of methadone-maintained pregnant patients. *Am J Drug Alcohol Abuse*. 2009;35(5):358–363
  184. Tuten M, Fitzsimons H, Hochheimer M, Jones HE, Chisolm MS. The impact of early substance use disorder treatment response on treatment outcomes among pregnant women with primary opioid use. *J Addict Med*. 2018;12(4):300–307
  185. Unger A, Jagsch R, Bäwert A, et al. Are male neonates more vulnerable to neonatal abstinence syndrome than female neonates? *Gen Med*. 2011;8(6):355–364
  186. Velez ML, Jansson LM, Schroeder J, Williams E. Prenatal methadone exposure and neonatal neurobehavioral functioning. *Pediatr Res*. 2009;66(6):704–709 <https://doi.org/10.1203/PDR.0b013e3181bc035d>
  187. Vilkins AL, Bagley SM, Hahn KA, et al. Comparison of post-cesarean section opioid analgesic requirements in women with opioid use disorder treated with methadone or buprenorphine. *J Addict Med*. 2017;11(5):397–401
  188. Wachman EM, Grossman M, Schiff DM, et al. Quality improvement initiative to improve inpatient outcomes for neonatal abstinence syndrome. *J Perinatol*. 2018;38(8):1114–1122
  189. Wachman EM, Newby PK, Vreeland J, et al. The relationship between maternal opioid agonists and psychiatric medications on length of hospitalization for neonatal abstinence syndrome. *J Addict Med*. 2011;5(4):293–299
  190. Wachman EM, Byun J, Philipp BL. Breastfeeding rates among mothers of infants with neonatal abstinence syndrome. *Breastfeed Med*. 2010;5(4):159–164 <https://doi.org/10.1089/bfm.2009.0079>
  191. Wachman EM, Warden AH, Thomas Z, et al. Impact of psychiatric medication co-exposure on neonatal abstinence syndrome severity. *Drug Alcohol Depend*. 2018;192:45–50



192. Walsh MC, Crowley M, Wexelblatt S, et al; Ohio Perinatal Quality Collaborative. Ohio Perinatal Quality Collaborative improves care of neonatal narcotic abstinence syndrome. *Pediatrics*. 2018;141(4):e20170900
193. Wang MJ, Kuper SG, Sims B, et al. Opioid detoxification in pregnancy: systematic review and meta-analysis of perinatal outcomes. *Am J Perinatol*. 2019;36(6):581–587
194. Wiegand SL, Stringer EM, Stuebe AM, Jones H, Seashore C, Thorp J. Buprenorphine and naloxone compared with methadone treatment in pregnancy. *Obstet Gynecol*. 2015;125(2):363–368
195. Wilder CM, Hosta D, Winhusen T. Association of methadone dose with substance use and treatment retention in pregnant and postpartum women with opioid use disorder. *J Subst Abuse Treat*. 2017;80:33–36
196. Winkelman TNA, Ford BR, Schlafer RJ, McWilliams A, Admon LK, Patrick SW. Medications for opioid use disorder among pregnant women referred by criminal justice agencies before and after Medicaid expansion: a retrospective study of admissions to treatment centers in the United States. *PLoS Med*. 2020;17(5):e1003119
197. Wong J, Saver B, Scanlan JM, et al. Does maternal buprenorphine dose affect severity or incidence of neonatal abstinence syndrome? *J Addict Med*. 2018;12(6):435–441
198. Wunsch MJ. A chart review comparing paregoric to methadone in the treatment of neonatal opioid withdrawal. *J Addict Dis*. 2006;25(3):27–33
199. Yonke N, Jimenez EY, Leeman L, Leyva Y, Ortega A, Bakhireva LN. Breastfeeding motivators and barriers in women receiving medications for opioid use disorder. *Breastfeed Med*. 2020;15(1):17–23
200. Yonke N, Maston R, Weitzen S, Leeman L. Breastfeeding intention compared with breastfeeding postpartum among women receiving medication-assisted treatment. *J Hum Lact*. 2019;35(1):71–79
201. Young ME, Hager SJ, Spurlock D Jr. Retrospective chart review comparing morphine and methadone in neonates treated for neonatal abstinence syndrome. *Am J Health Syst Pharm*. 2015;72(23 suppl 3):S162–S167
202. Zedler BK, Mann AL, Kim MM, et al. Buprenorphine compared with methadone to treat pregnant women with opioid use disorder: a systematic review and meta-analysis of safety in the mother, fetus and child. *Addiction*. 2016;111(12):2115–2128
203. Alexander K, Short V, Gannon M, Goyal N, Naegle M, Abatemarco DJ. Identified gaps and opportunities in perinatal healthcare delivery for women in treatment for opioid use disorder [published online ahead of print on August 9, 2020]. *Subst Abuse*. doi:https://doi.org/10.1080/08897077.2020.1803178
204. Atwood EC, Sollender G, Hsu E, et al. A qualitative study of family experience with hospitalization for neonatal abstinence syndrome. *Hosp Pediatr*. 2016;6(10):626–632
205. Demirci JR, Bogen DL, Klionsky Y. Breastfeeding and methadone therapy: the maternal experience. *Subst Abuse*. 2015;36(2):203–208
206. Falletta L, Hamilton K, Fischbein R, Aultman J, Kinney B, Kenne D. Perceptions of child protective services among pregnant or recently pregnant, opioid-using women in substance abuse treatment. *Child Abuse Negl*. 2018;79:125–135
207. Goodman DJ, Saunders EC, Wolff KB. In their own words: a qualitative study of factors promoting resilience and recovery among postpartum women with opioid use disorders. *BMC Pregnancy Childbirth*. 2020;20(1):178
208. Hahn J, Lengerich A, Byrd R, et al. Neonatal abstinence syndrome: the experience of infant massage. *Creat Nurs*. 2016;22(1):45–50
209. Hicks J, Morse E, Wyant DK. Barriers and facilitators of breastfeeding reported by postpartum women in methadone maintenance therapy. *Breastfeed Med*. 2018;13(4):259–265
210. Howard H. Experiences of opioid-dependent women in their prenatal and postpartum care: implications for social workers in health care. *Soc Work Health Care*. 2016;55(1):61–85
211. Howard MB, Wachman E, Levesque EM, Schiff DM, Kistin CJ, Parker MG. The joys and frustrations of breastfeeding and rooming-in among mothers with opioid use disorder: a qualitative study. *Hosp Pediatr*. 2018;8(12):761–768
212. Jackson A, Shannon L. Barriers to receiving substance abuse treatment among rural pregnant women in Kentucky. *Matern Child Health J*. 2012;16(9):1762–1770
213. Mattocks KM, Clark R, Weinreb L. Initiation and Engagement with Methadone Treatment among Pregnant and Postpartum Women. *Womens Health Issues*. 2017;27(6):646–651 https://doi.org/10.1016/j.whi.2017.05.002
214. Ostrach B, Leiner C. “I didn’t want to be on Suboxone at first . . .” - Ambivalence in perinatal substance use treatment. *J Addict Med*. 2019;13(4):264–271
215. Rizzo RA, Neumann AM, King SO, Hoey RF, Finnell DS, Blondell RD. Parenting and concerns of pregnant women in buprenorphine treatment. *MCN Am J Matern Child Nurs*. 2014;39(5):319–324
216. Rockefeller K, Macken LC, Craig A. Trying to do what is best: a qualitative study of maternal-infant bonding and neonatal abstinence syndrome. *Adv Neonatal Care*. 2019;19(5):E3–E15
217. Scott LF, Shieh C, Umoren RA, Conard T. Care experiences of women who used opioids and experienced fetal or infant loss. *J Obstet Gynecol Neonatal Nurs*. 2017;46(6):846–856
